# 1 **Isotopic signatures induced by upwelling tag regional fish**

## 2 **populations in Lake Tanganyika**

3 Benedikt Ehrenfels\*<sup>1,2</sup>, Julian Junker\*<sup>3,4</sup>, Demmy Namutebi<sup>4,5</sup>, Cameron M. Callbeck<sup>1</sup>,  
4 Christian Dinkel<sup>1</sup>, Anthony Kalangali<sup>6</sup>, Ismael A. Kimirei<sup>6,7</sup>, Athanasio S. Mbonde<sup>6</sup>,  
5 Julieth B. Mosille<sup>6</sup>, Emmanuel A. Sweke<sup>6,8</sup>, Carsten J. Schubert<sup>1,2</sup>, Ole Seehausen<sup>3,4</sup>,  
6 Catherine E. Wagner<sup>9</sup>, Bernhard Wehrli<sup>1,2</sup>

7 \*shared first authorship

8 <sup>1</sup>Eawag, Swiss Federal Institute of Aquatic Science and Technology, Department Surface Waters –  
9 Research and Management, Kastanienbaum, Switzerland

10 <sup>2</sup>ETH Zurich, Institute of Biogeochemistry and Pollutant Dynamics, Zurich, Switzerland

11 <sup>3</sup>Eawag, Swiss Federal Institute of Aquatic Science and Technology, Department Fish Ecology and  
12 Evolution, Kastanienbaum, Switzerland

13 <sup>4</sup>University of Bern, Institute of Ecology & Evolution, Bern, Switzerland

14 <sup>5</sup>IHE Delft, Institute for Water Education, Delft, Netherlands

15 <sup>6</sup>TAFIRI, Tanzania Fisheries Research Institute, Kigoma, Tanzania

16 <sup>7</sup>TAFIRI, Tanzania Fisheries Research Institute, Dar es Salaam, Tanzania

17 <sup>8</sup>DSFA, Deep Sea Fishing Authority, Zanzibar, Tanzania

18 <sup>9</sup>University of Wyoming, Department of Botany and Program in Ecology, Laramie, USA

19

20

21 Correspondence to: Benedikt Ehrenfels ([benedikt.ehrenfels@eawag.ch](mailto:benedikt.ehrenfels@eawag.ch))

22

23 **Keywords:** stratification, mixing, isoscape, isotope analysis, genetic structure, diet, lipid

24 storage, food web, fish migration, pelagic

*Linking hydrodynamics to regional fish populations in Lake Tanganyika*

25 **Statement of significance**

26 Only little is known about how hydrodynamic gradients, leading to nutrient-rich and  
27 nutrient-poorer areas, induce ecological and genetic differences among populations of  
28 highly mobile, pelagic fish inhabiting these different areas. Here, we investigate the  
29 pelagic fish species of Lake Tanganyika, which support the second largest inland fishery  
30 in Africa. We characterize the effect of the basin-scale hydrodynamics – including a  
31 heavily stratified north and an upwelling-driven south basin – on the isotope signatures of  
32 the food web and examine the connectivity and ecology of the northern and southern fish  
33 populations in the lake. By combining our isotope data with genetics, we demonstrate  
34 that the fish form regional populations on a seasonal to multiannual time scale. Based on  
35 their isotope and elemental ratios, we found no significant differences in diet or lipid  
36 content between the regional populations. We suggest that the development of basin-scale  
37 ecological differences in response to the prevailing hydrodynamic regimes may be  
38 inhibited by lake-wide gene flow on the long term.

*Linking hydrodynamics to regional fish populations in Lake Tanganyika*

39 **Abstract**

40 Lake Tanganyika's pelagic fish sustain the second largest inland fishery in Africa and are  
41 under pressure from heavy fishing and global warming related increases in stratification.  
42 Only little is known about whether basin-scale hydrodynamics – including a more  
43 stratified north and an upwelling-driven south – lead to regional fish populations with  
44 varying ecological adaptations. Here, we examine whether the basin-scale dynamics  
45 leave distinct isotopic imprints in the pelagic fish of Lake Tanganyika, which may reveal  
46 differences in habitat, diet, or lipid content. We conducted two lake-wide campaigns  
47 during different seasons and collected physical, nutrient, chlorophyll, phytoplankton and  
48 zooplankton data. Additionally, we analyzed the pelagic fish – the clupeids *Stolothrissa*  
49 *tanganicae*, *Limnothrissa miodon* and four *Lates* species – for their isotopic and  
50 elemental carbon (C) and nitrogen (N) compositions. The  $\delta^{13}\text{C}$  values were significantly  
51 higher in the productive south after the upwelling/mixing period across all trophic levels,  
52 implying that the fish have regional foraging grounds, and thus record these latitudinal  
53 isotope gradients. However, the degree of regional isolation is insufficient to suppress  
54 lake-wide gene flow, suggesting that the fish form regional populations only on a basin-  
55 wide and seasonal scale. Based on  $\delta^{15}\text{N}$  and C:N ratios, we found no strong evidence for  
56 varying diets or lipid contents between those populations. Additional analyses revealed  
57 that isotopic variations between specimens from the same location are not linked to  
58 genetic differences. Our findings provide fundamental insight on the connectivity and  
59 ecology of Lake Tanganyika's pelagic fish and imply that sustainable management  
60 strategies may adopt basin-scale fishing quotas.

*Linking hydrodynamics to regional fish populations in Lake Tanganyika*

61 **1 Introduction**

62 Lake Tanganyika is by volume the second largest freshwater lake in the world, and its  
63 pelagic fish community sustains the second largest inland fishery in Africa (Mölsä et al.  
64 1999), providing important employment opportunities and animal protein for millions of  
65 people in the riparian communities (Kimirei et al. 2008; Van der Knaap et al. 2014). The  
66 pelagic food web in Lake Tanganyika is composed of a copepod-dominated zooplankton  
67 assemblage, a phyto- and zooplankton grazer community consisting of two endemic  
68 sardine species (*Stolothrissa tanganyicae* and *Limnothrissa miodon*), and a predator  
69 assemblage comprising of four endemic latid species (genus *Lates*), of which *Lates*  
70 *stappersii* is the most common (Coulter 1991). Today, the sardines and *Lates stappersii*  
71 account for 95 % of the pelagic fish catch in Lake Tanganyika (Mölsä et al. 2002).

72 The pelagic fish stocks suffer from heavy fishing (Sarvala et al. 2006; Van der Knaap et  
73 al. 2014) and from a long term decline that was attributed to climate change (O'Reilly et  
74 al. 2003; Cohen et al. 2016; McGlue et al. 2020). The increased warming of the surface  
75 waters caused by climate change leads to steep temperature gradients in the water  
76 column. These gradients build physical barriers to vertical mixing, thereby limiting the  
77 transfer of nutrients to surface waters where light is available to drive primary  
78 productivity (O'Reilly et al. 2003; Verburg et al. 2003, 2006; Verburg 2007; Tierney et  
79 al. 2010; Cohen et al. 2016).

80 Although assessing potential long-term changes in the ecology of the pelagic fish is  
81 impaired by data scarcity, Lake Tanganyika's limnological cycle offers the opportunity to  
82 study the impact of varying levels of stratification on a basin-scale. This annual cycle is

*Linking hydrodynamics to regional fish populations in Lake Tanganyika*

83 driven by climatic differences between the north and south and is characterized by four  
84 stages (Fig. 1 a-d; Plisnier *et al.*, 1999; Verburg, Antenucci & Hecky, 2011): (1) In the  
85 warm rainy season (November-March), stagnant and highly stratified waters lead to an  
86 overall nutrient-depleted epilimnion (Fig. 1 a), and internal waves only cause local  
87 nutrient injections into the surface waters (Naithani et al. 2003). (2) In March-May, the  
88 southeast trade winds initiate the lake circulation in the upper water column, resulting in  
89 strong nutrient upwelling in the southern basin (Fig. 1 b). (3) The upwelling in the south  
90 transforms into a convective mixing of the upper ~150 m. The sinking, cool surface  
91 waters in the south reverse the lake circulation by initiating a northward current between  
92 50-100 m and a surface counter current, further weakening thermal stratification across  
93 the lake (Fig. 1 c). (4) The trade winds cease in October, slowing down the circulation,  
94 while the water column re-stratifies lake-wide. A weaker, secondary upwelling leads to a  
95 nutrient pulse at the northern end of the lake (Fig. 1 d).

## Linking hydrodynamics to regional fish populations in Lake Tanganyika

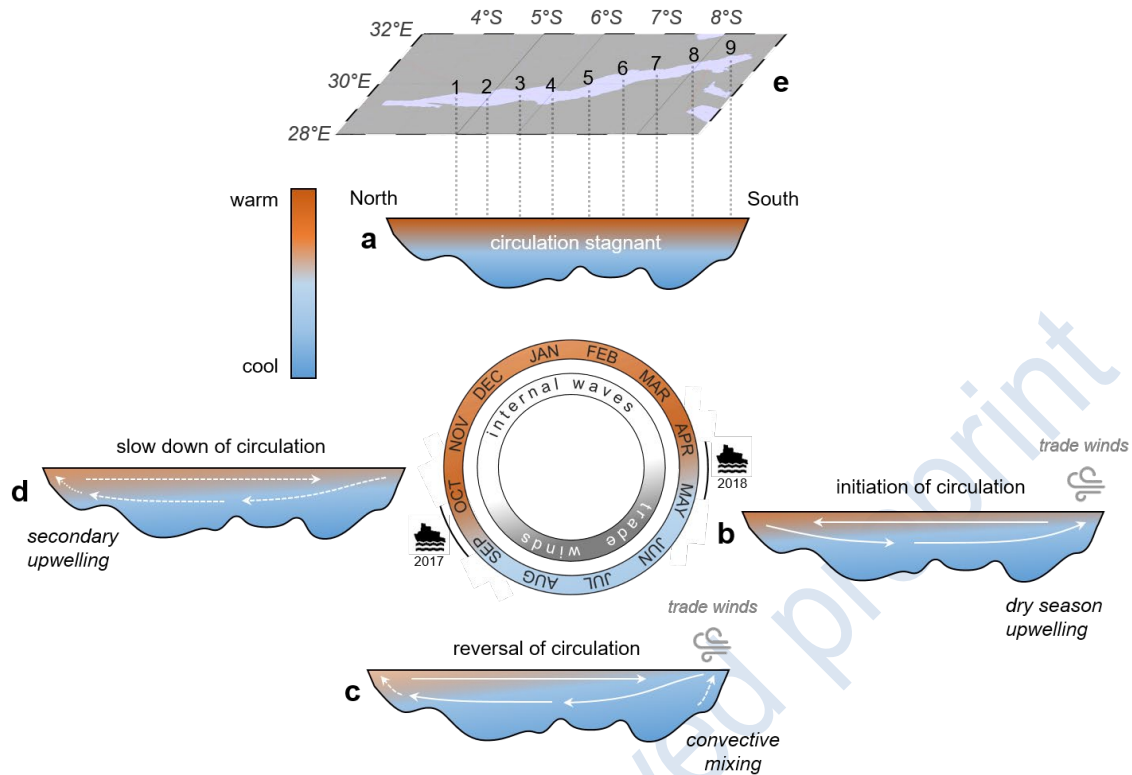

96

97 **Fig. 1:** The limnological cycle of Lake Tanganyika with its four major phases according to Plisnier *et al.*

98 (1999) and Verburg *et al.* (2011). (a) Stagnant, highly stratified waters during the warm rainy season

99 (November-March) only support low nutrient availability. (b) The onset of the cool dry winds in March-

100 May initiates the upwelling in the South leading to high nutrient fluxes in this region. (c) The lake

101 circulation reverses during the dry season (May-September). Water column stratification is low and the

102 nutrient availability high across the lake, with a maximum in the convective mixing area in the south. (d)

103 The trade winds cease in October slowing down the lake circulation, while the water column re-stratifies. A

104 weaker secondary upwelling leads to a nutrient pulse at the northern end of the lake. During the dry season,

105 wind-driven upwelling and mixing are the dominant driving force behind nutrient injections into the

106 euphotic zone, whereas internal waves are particularly important in the rainy season. The color gradient

107 indicates the level of thermal stratification. Note that this latitudinal cross-section is not to scale and that

108 the outlined mechanism primarily affects the upper water column (<200 m). Our two sampling campaigns

109 were timed at the seasonal transitions in September/October and April/May to compare the effects of the

110 preceding dry and rainy seasons. (e) The map shows the nine stations for water column and plankton

*Linking hydrodynamics to regional fish populations in Lake Tanganyika*

111 sampling. Fish samples representing the pelagic catch were collected from the respective coastal  
112 villages/towns.

113 benefit sardine spawning and recruitment (Mulimbwa et al. 2014b). The north-south  
114 variability furthermore affects the zooplankton community composition: shrimps and  
115 calanoid copepods prevail in the south (Narita et al. 1986; Pearce 1991; Kurki et al.  
116 1999a), whereas cyclopoid copepods and jellyfish dominate in the north (Kurki et al.  
117 1999b; Mgana et al. 2014; Cirhuza and Plisnier 2016). Differences in the zooplankton  
118 community may in turn influence predatory fish. Mannini *et al.* (1999) found that the diet  
119 of *Lates stappersii* in the north is heterogeneous and consists of copepods, shrimps, and  
120 sardines, whereas *Lates stappersii* in the south feed mainly on shrimps.

121 The spatial variability in Lake Tanganyika's pelagic habitat, driven by the mixing regime,  
122 could additionally impact the life cycle (e.g. spawning phenology, developmental timing  
123 and recruitment success) of the pelagic fish species (Matthes 1967; Kimirei and Mgaya  
124 2007; Mulimbwa et al. 2014a; b). The spatial variation in the pelagic environment might  
125 generate different fitness optima and drive divergent adaptation of pelagic fish  
126 populations between north and south, if horizontal migration remains limited. However,  
127 recent genetic studies of the sardines (De Keyzer et al. 2019; Junker et al. 2020) and the  
128 four *Lates* species (Rick et al. 2021) did not find evidence for genetic population  
129 differentiation along the north-south gradient, suggesting that gene flow may overcome  
130 any possible effects of divergent natural selection between the basins. Nonetheless, the  
131 fish populations may still respond to differences in physicochemical conditions and food  
132 supply by evolving ecological adaptations to the regional environments. Such responses  
133 might involve variations in food web interactions (Cornelissen et al. 2018) or lipid

*Linking hydrodynamics to regional fish populations in Lake Tanganyika*

134 storage for bridging lean periods (Montgomery and Galzin 1993; Arrington et al. 2006).

135 However, possible effects of the seasonality and spatial variation in the physical mixing

136 regime of Lake Tanganyika on the distribution and ecology of its pelagic fish have not

137 been studied.

138 Characterizing seasonal and spatial gradients in the carbon (C) and nitrogen (N)

139 elemental and isotopic composition of Lake Tanganyika's food web may provide insight

140 to the migration distances, diets, and lipid contents of the fish species. Indeed, an isotopic

141 study of fish and their surrounding food web along a geographical gradient can reveal

142 regional population isolation if environmental differences among sites translate into

143 divergent isotopic signatures of regional or local fish populations (Logan et al. 2020). In

144 this isotopic framework, the  $^{13}\text{C}/^{12}\text{C}$  ratio or  $\delta^{13}\text{C}$  increases only little from one trophic

145 level to the next and therefore reflects the source of primary production (Van der Zanden

146 et al. 1997; Post 2002; Fry 2006). Differences in primary productivity can alter the  $\delta^{13}\text{C}$

147 of particulate organic matter (POM): high primary productivity results typically in high

148 values of  $\delta^{13}\text{C}$ , due to the ongoing depletion of the of the DIC pool and decreasing

149 discrimination against  $^{13}\text{C}$  by phytoplankton (Hollander and McKenzie 1991; Gu et al.

150 1996; Bidigare et al. 1997, 1999; Rau et al. 1997; Close and Henderson 2020).

151 Investigations from other lakes show that changes in  $\delta^{13}\text{C}$  at the base of the food web can

152 be tracked across trophic levels from plankton to fish (Perga and Gerdeaux 2005). For

153 Lake Tanganyika, O'Reilly *et al.* (2003) and Verburg (2007) used the  $\delta^{13}\text{C}$ -POM to

154 reconstruct historical changes in primary productivity. In addition, previous  $\delta^{13}\text{C}$  analyses

155 in the northern basin have reported higher  $\delta^{13}\text{C}$ -POM values in the productive dry season

156 compared to the rainy season (O'Reilly et al. 2002; Sarvala et al. 2003; Salonen et al.



*Linking hydrodynamics to regional fish populations in Lake Tanganyika*

157 2012). The ratio of  $^{15}\text{N}/^{14}\text{N}$ , or  $\delta^{15}\text{N}$ , provides insight into the trophic position of an  
158 organism, because it increases significantly with each trophic level. This successive  
159 enrichment allows estimating an organism's trophic position in the food web and is used  
160 in ecology to describe prey and predator relationships (Van der Zanden et al. 1997; Post  
161 2002; Fry 2006). Lastly, the elemental C:N ratio was often used to infer the lipid content  
162 of fish muscle tissue, with higher C:N denoting higher lipid contents (Post et al. 2007;  
163 Logan et al. 2008).

164 In this study, we explore the latitudinal and seasonal patterns of  $\delta^{13}\text{C}$  and  $\delta^{15}\text{N}$  in the  
165 pelagic food web of Lake Tanganyika in the context of the lake's limnological variability.  
166 During two lake-wide field campaigns in the final phases of the dry and the rainy  
167 seasons, we measured the C and N isotopic and elemental compositions of the major  
168 pelagic food web members (POM, zooplankton, the bivalve *Pleiodon spekii*, fish). These  
169 samples were collected in concert with limnological data including the physical  
170 properties of the water column, oxygen and nutrient concentrations, chlorophyll, as well  
171 as the phyto- and zooplankton community and abundance (Ehrenfels et al. 2021). Using  
172 the extensive data sets from those two contrasting time points, we first tested to which  
173 extend the regional and seasonal patterns in primary productivity induce systematic  
174 differences in the isotopic signatures of plankton, and then tracked the isotopic signals  
175 and C:N ratios through the food web to the pelagic fish. The results allowed us to assess  
176 the extent of regional isolation and ecological differentiation of the pelagic fish  
177 populations. Finally, we tested whether existing genetic differences (Junker et al. 2020;  
178 Rick et al. 2021) were linked to dietary differences in the six major pelagic fish species.

*Linking hydrodynamics to regional fish populations in Lake Tanganyika*

179

## 180 **2 Materials & Methods**

### 181 **2.1 Study site and sampling**

182 Our two Lake Tanganyika sampling campaigns, spanning two different hydrological  
183 conditions across a north-south transect of ~500 km, were conducted at the end of the dry  
184 season (28 September - 8 October 2017) and the end of the following rainy season (27  
185 April - 7 May 2018). Water column and plankton characteristics were sampled during  
186 two cruises on *M/V Maman Benita* (Ehrenfels et al. 2020, 2021). At the end of the dry  
187 season, we collected fish samples as described in Junker et al. (2020) at station 1, station  
188 2, station 5, station 7 and station 9 during a land-based excursion prior to the cruise (17-  
189 24 September 2017), whereas all nine landing sites, corresponding to our nine pelagic  
190 sampling stations, were sampled during the cruise at the end of the rainy season (Fig. 1  
191 e). In addition, we took fish samples in Kigoma in July 2017 (Junker et al. 2020).

192

### 193 **2.2 Physical and chemical parameters**

194 We measured temperature, dissolved oxygen, photosynthetically active radiation, and in-  
195 situ chlorophyll fluorescence via CTD profiling (Sea-Bird SBE 19plus) at each station.  
196 From these stations, we also collected water with large Niskin bottles (20-30 L) at 5-25 m  
197 depth intervals down to 250 m depth. Water column stratification was expressed as  
198 buoyancy frequency ( $N^2$ ) and Schmidt stability ( $Sc$ ). We interpreted clear peaks in  $N^2$  as

*Linking hydrodynamics to regional fish populations in Lake Tanganyika*

199 thermoclines, whereby the  $N^2$  value at the peak provides a measure of steepness of the  
200 thermocline. In addition, we calculated the  $Sc$  over  $1 \text{ m}^2$  between 50 and 100 m for each  
201 station using the R package ‘rLakeAnalyzer’ (Winslow et al. 2019). This depth interval  
202 extends from the typical location of the nitrate peak to the bottom of the euphotic zone  
203 (Cocquyt and Vyverman 2005; Descy et al. 2005; Ehrenfels et al. 2021). For a more  
204 detailed description of the thermal structure of the water column see Ehrenfels et al.  
205 (2021).

206 Water samples to measure nutrients (phosphate, ammonium, nitrate, and nitrite) were  
207 taken directly from the Niskin bottles, filtered sterile through  $0.2 \mu\text{m}$  filters and processed  
208 on-board following standard methods (Grasshoff et al. 1999; Holmes et al. 1999;  
209 Schnetger and Lehnert 2014). On average, the detection limits were 0.22, 0.34, 0.20, and  
210  $0.03 \mu\text{M}$  for phosphate, ammonium, nitrate, and nitrite, respectively.

211 Water samples to measure dissolved inorganic carbon (DIC) were collected in 12 mL  
212 exetainers directly from the Niskin bottles and filtered sterile ( $0.2 \mu\text{m}$ ). Samples were  
213 stored at room temperatures and shipped to Switzerland. At Eawag Kastanienbaum, the  
214 DIC concentrations were measured by high temperature combustion catalytic oxidation  
215 using a Shimadzu TOC-L Analyzer (Shimadzu TOC-VCPH/CPN). A 2 mL aliquot of the  
216 DIC sample was used to quantify the isotopic fractionation of  $\delta^{13}\text{C}$ -DIC. The aliquot  
217 subsample was transferred to a new 12 mL exetainer, where it was Helium purged for 2  
218 minutes. The sample was then capped and  $50 \mu\text{L}$  orthophosphorous acid (85 %) was  
219 added. The samples were mixed and stored for  $\sim 15 \text{ h}$  at room temperature for

*Linking hydrodynamics to regional fish populations in Lake Tanganyika*

220 equilibration prior to analysis by GC-IRMS (Isoprime). Sample  $\delta^{13}\text{C}$ -DIC was adjusted to  
221 the standard *Carrara marmor* (ETH Zurich).

222

223 **2.3 CO<sub>2</sub> fixation rates**

224 Carbon fixation incubations and rate calculations were done as described in Schunck et  
225 al. (2013) and Callbeck et al. (2021). Briefly, samples were carefully filled from the  
226 Niskin into 4.5 L polycarbonate bottles capped with polypropylene membranes. Per  
227 sampled depth, we filled off triplicate bottles, including one control (no added label) and  
228 duplicate treatments (with amended  $^{13}\text{C}$ - $\text{HCO}_3^-$ ). We added 4.5 mL of  $^{13}\text{C}$ -bicarbonate  
229 solution (1 g  $^{13}\text{C}$ -bicarbonate in 50 ml water; Sigma Aldrich) to each of the treatment  
230 bottles. The label was mixed in the treatment bottles for ~30 min under shaking.  
231 Thereafter, a 12 mL subsample was taken for quantifying the labelling percent (mean 2.8  
232 %). The resulting headspace was re-filled with water from the same depth, and bottles  
233 were then incubated headspace-free in 60 L incubators covered with shaded light filters  
234 (LEE Filters) mimicking the in-situ irradiance and light spectrum. After 24 h, the samples  
235 were filtered on pre-combusted GF/F filters (Whatman). The filters were oven-dried (60°  
236 C for 48 h) and stored at ambient temperatures. Filter samples were shipped to  
237 Switzerland and further processed as described in 2.7. Due to the small difference  
238 between the in-situ and incubation temperatures (<5° C), the derived CO<sub>2</sub> fixation rates  
239 were not adjusted for temperature.

240

*Linking hydrodynamics to regional fish populations in Lake Tanganyika*

241 **2.4 Chlorophyll, phytoplankton and particulate matter**

242 We measured the chlorophyll-*a* concentrations according to Wasmund, Topp & Schories  
243 (2006). Briefly, 2-4 L of lake water were filtered through 47 mm glass fibre filters  
244 (GF55, Hahnemühle), which were directly transferred to 15 mL plastic tubes. Five mL  
245 ethanol (>90 %) were added to the samples, followed by 10 min cold ultrasonification.  
246 The samples were stored at 5 °C overnight and sterile-filtered (0.2 µm) the following  
247 morning. The extracts were measured on-board with a fluorometer (Turner Trilogy) and  
248 calibrated against a chlorophyll-*a* standard (Lot# BCBS3622S, Sigma-Aldrich). Samples  
249 and standards were always handled and processed in the dark. In-situ chlorophyll  
250 fluorescence was calibrated against extracted chlorophyll-*a* samples and then used to  
251 calculate depth-integrated chlorophyll-*a* stocks (0-125 m).

252 For estimating the phytoplankton abundances, 4-10 L of water were concentrated to 20  
253 mL using a 10 µm plankton net and fixed with alkaline Lugol solution. At TAFIRI  
254 Kigoma, phytoplankton cells were counted from 2 mL subsamples by inverted  
255 microscopy (at ×400 magnification). For particulate organic matter (POM), 2-4 L lake  
256 water was filtered through precombusted GF/F filters (nominal pore size 0.7 µm;  
257 Whatman).

258

259 **2.5 Zooplankton and Pleiodon spekii**

260 Zooplankton was collected with vertical net hauls across the oxygenated water column  
261 (0-150 m) at each pelagic station. We sampled different size fractions of the zooplankton

## *Linking hydrodynamics to regional fish populations in Lake Tanganyika*

262 community using three different nets. For smaller zooplankton, we used 25 and 95  $\mu\text{m}$   
263 nets with 0.03 and 0.02  $\text{m}^2$  mouth openings, respectively. A 250  $\mu\text{m}$  net with a 0.28  $\text{m}^2$   
264 mouth opening was used for larger, fast swimming species. We preserved all zooplankton  
265 collected from the first haul in ethanol for taxonomic zooplankton community  
266 assessment, while the individuals from the second haul were designated for stable isotope  
267 analysis (only for samples from the 95 and 250  $\mu\text{m}$  nets). At TAFIRI Kigoma, we  
268 analyzed the zooplankton community composition of the ethanol-preserved samples by  
269 compound microscopy (Leica Wild M3B) at x200 magnification. Additionally, we  
270 picked living individuals of the long-lived, filter-feeding bivalve *Pleiodon spekii* at near-  
271 shore habitats in water depths of 1.5-6 m by snorkelling. Bivalves were first euthanized  
272 with an overdose of MS222. Then we sampled the foot using clean scalpels and forceps  
273 and removed the mucous with tissues and deionized water.

274

### 275 **2.6 Fish**

276 At on-shore landing sites adjacent to our sampling stations, we obtained fish specimens  
277 from fishermen, which usually fish within a 20 km radius from their landing sites. We  
278 collected *Stolothrissa tanganyicae*, *Limnothrissa miodon*, *Lates stappersii*, *Lates*  
279 *microlepis*, *Lates mariae*, and *Lates angustifrons* and processed them according to the  
280 standard protocol described in Junker *et al.* (2020). For stable isotope analysis, we  
281 sampled the dorsal muscle using clean scalpels and forceps and removed the skin.

282

## *Linking hydrodynamics to regional fish populations in Lake Tanganyika*

### 283 **2.7 Isotopic and elemental analysis of solids**

284 All solid isotope samples (POM, zooplankton, *P. spekii*, and fish) were oven-dried at ~60  
285 °C for at least 24 h after collection and then packed in aluminium foil or small sample  
286 tubes. Dried samples were stored at room temperature and shipped to Switzerland. At  
287 Eawag Kastanienbaum, we fumed the POM samples for 48 h under HCl atmosphere to  
288 remove inorganic carbon. Fish and *P. spekii* samples were ground to fine powder using a  
289 Qiagen Tissuelyzer II. We measured the C and N elemental and isotopic compositions  
290 with an EA-IRMS (vario PYRO cube, Elementar coupled with an IsoPrime IRMS, GV  
291 Instruments). *Acetanilide #1* (Indiana University, CAS # 103-84-4) was used as an  
292 internal standard. The isotopic ratios of the samples are reported in the delta notation  
293 VPDB for carbon and air for nitrogen. Standard and sample reproducibility was generally  
294 better than 0.2 ‰ for  $\delta^{13}\text{C}$  and 0.5 ‰ for  $\delta^{15}\text{N}$  and highest for fish tissue (0.1 ‰ for  $\delta^{13}\text{C}$   
295 and 0.2 ‰ for  $\delta^{15}\text{N}$ ).

296

### 297 **2.8 Lipid content of fish muscle tissue**

298 For a subsample of *Stolothrissa* individuals, which exhibited the largest range in C:N  
299 ratios, we measured the total lipid content to test whether a high C:N ratio effectively  
300 translates to a higher amount of lipids in fish tissue. Total lipid content was determined  
301 gravimetrically following Folch, Lees & Sloane-Stanley (1957). In brief, ~1 mg of dried  
302 fish muscle powder was weighed into a pre-combusted glass vial, and 1 mL of 2:1  
303 (vol:vol) dichloromethane:methanol solution was added. The sample was then

*Linking hydrodynamics to regional fish populations in Lake Tanganyika*

304 ultrasonicated for 10 min. The supernatant was transferred to another pre-combusted, pre-  
305 weighed glass vial and evaporated in a heat block. The entire procedure was repeated two  
306 more times, and the resulting dry lipid mass weighed to the nearest 0.001 mg.

307

308 **2.9 Data analysis**

309 For calculating the depth-integrated isotopic values of POM, we normalized each sample  
310 for the phytoplankton abundance at the respective depth. We corrected the  $\delta^{13}\text{C}$  of non-  
311 lipid-extracted animal tissue for its lipid content according to Post *et al.* (2007). We  
312 estimated lipid content in fish tissue according to the theoretical model from the same  
313 study. For comparing the isotopic composition and the C:N ratios of fish populations  
314 between different regions, we selected individuals from stations where samples were  
315 available from both campaigns (north: stations 1 and 2; south: stations 7 and 9). From this  
316 subset, we additionally selected the individuals from the 50 mm size range with the  
317 highest overlap across regions and sampling campaigns for each species to minimize  
318 size-specific effects (Figs. S1; S2; Jessen et al. 2019). The chosen size ranges were 40-90  
319 mm for *Stolothrissa*, 75-125 mm for *Limnothrissa*, and 200-250 mm for *Lates stappersii*.  
320 For the same analyses and reasons, we selected *P. spekii* from the exact same sites,  
321 whereas for zooplankton we used stations 1-3 (north) and 7-9 (south), because  
322 zooplankton samples were available from all stations, but we had only one sample per  
323 station. The Bayesian ellipses in the isotopic space were calculated using the R package  
324 SIBER (Jackson et al. 2011).

325



*Linking hydrodynamics to regional fish populations in Lake Tanganyika*

326 **3. Results**

327 **3.1 Biogeochemistry and hydrodynamic conditions in Lake Tanganyika**  
328 **during sampling**

329 We observed strong differences in water column stratification and biogeochemistry in  
330 Lake Tanganyika between the two sampling campaigns and among basins (Fig. 2). Our  
331 sampling campaign at the end of the dry season (September/October) exhibited southerly  
332 trade winds that are characteristic for the wind-driven upwelling and mixing period (Fig.  
333 1 c, d). By contrast, the winds were mostly calm and it was rainy at the end of the rainy  
334 season (April), which is typical for this time (Fig. 1 b). Compared to Apr/May, we find  
335 significantly lower  $Sc$  and  $N^2$  values as well as lower surface temperatures ( $\Delta \sim 0.5$  °C) in  
336 Sep/Oct, indicating that the lake was less stratified during that period (Fig. 2 a-d;  $Sc$ : 0.4-  
337 0.7 versus 0.5-1.1  $\text{kJ m}^{-2}$ ;  $N^2$ : 1.5-2.7 versus  $2.4-5.0 \cdot 10^{-4} \text{ s}^{-2}$ ; Mann-Whitney-U Tests,  $p$   
338  $< 0.05$ ). However, during both campaigns  $Sc$  values of the 50-100 m interval decreased  
339 towards the south, indicating some degree of upwelling/mixing (Fig. 2 a, b). At the end of  
340 the rainy season, the southern stations were sampled in May during the onset of the trade  
341 winds. The thermocline was not as heavily uplifted in the southern basin in Apr/May  
342 compared to Sep/Oct, when no thermocline had formed at station 9 (Fig. 2 c, d). This is a  
343 good indicator that wind-driven upwelling/mixing was not as pronounced in Apr/May.

344 The oxygen distribution closely followed the thermal structure of the lake (Fig. 2 e, f). In  
345 Sep/Oct, the more stratified water column in the northern basin exhibited a shallower  
346 oxycline (50-70 m at stations 1-3), defined here as a sharp drop in oxygen concentrations,

*Linking hydrodynamics to regional fish populations in Lake Tanganyika*

347 compared to the wind-driven mixing in the south, which introduced more oxygen to  
348 deeper layers of the water column (up to  $5 \text{ mg L}^{-1}$  at 113 m at station 9; Fig. 2 e). In  
349 Apr/May, the oxycline was lying relatively shallow across the full length of the lake from  
350 70-120 m; oxygen concentrations were roughly 2-fold lower in the deep waters of the  
351 southern basin compared to the well-mixed conditions in Sep/Oct ( $\sim 2.3 \text{ mg L}^{-1}$  at 113 m  
352 at station 9; Fig. 2 f).

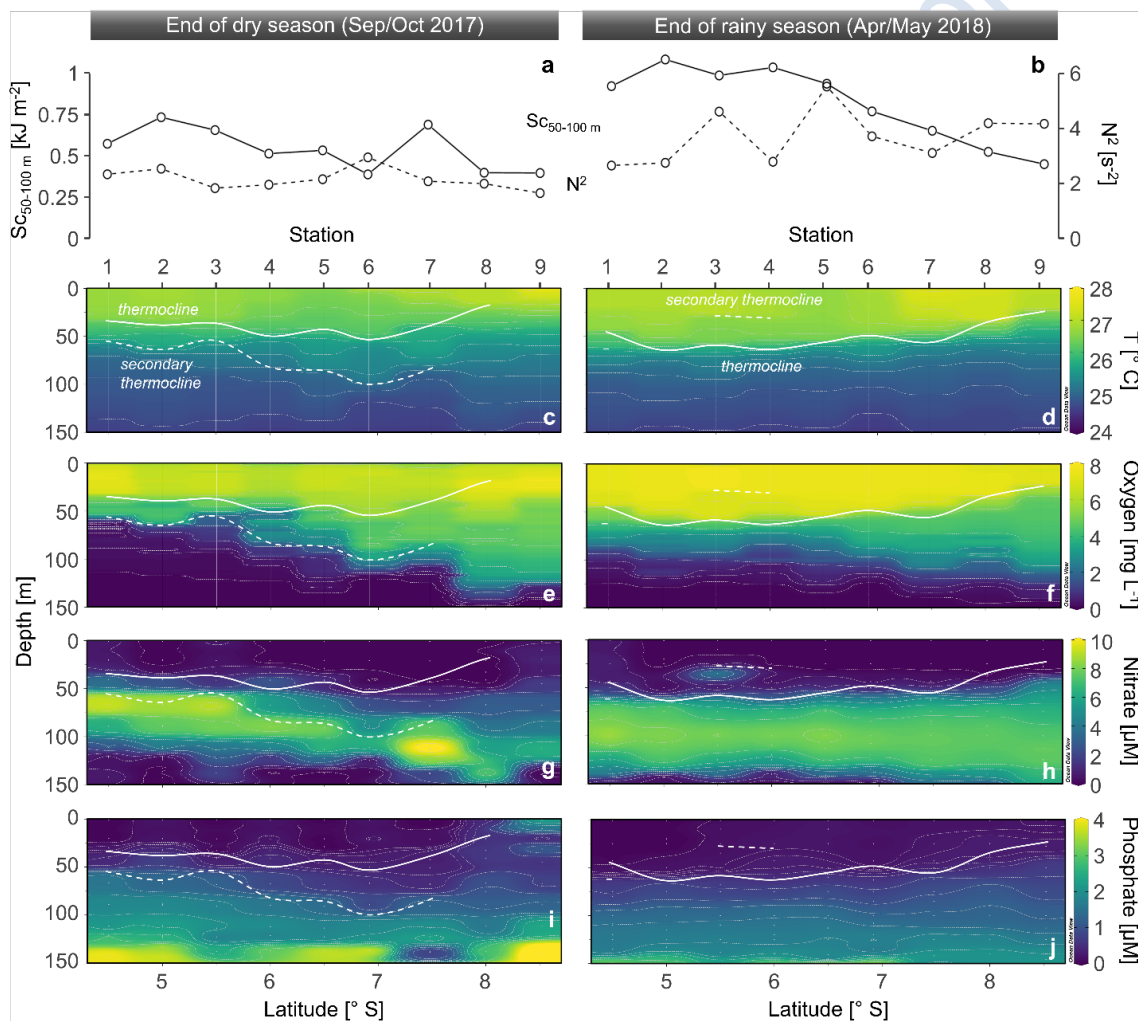

353  
354 **Fig. 2:** Physical and chemical properties of Lake Tanganyika along our north-south transects (from station  
355 1-9) at the end of the dry season (**left**) and the end of the rainy season (**right**). (**a,b**) Schmidt stability ( $Sc$ )  
356 of the 50-100 m depth interval and buoyancy frequency of the primary thermocline ( $N^2$ ). Distribution of

*Linking hydrodynamics to regional fish populations in Lake Tanganyika*

357 (c,d) temperature (T), (e,f) dissolved oxygen, (g,h) nitrate, and (i,j) phosphate. The solid white line depicts  
358 the thermocline, whereas the dashed white line represents less pronounced secondary thermoclines. No  
359 clear thermocline had formed at station 9 at the end of the dry season. Samples are indicated by vertical  
360 lines (continuous profiles) or points (discrete samples).

361 We also observed strong latitudinal changes in the nutrient distribution in Sep/Oct.  
362 Moving from north to south, the position of the nitrate maximum in the water column  
363 deepened from 67 m to 137 m, paralleling variation of the vertical phosphate gradients  
364 (Fig. 2 g, i). The surface waters in the southern basin were also associated with generally  
365 higher nitrate and especially phosphate concentrations. For instance, at some stations in  
366 the south, surface water nitrate and phosphate concentrations reached up to 2.3  $\mu\text{M}$ ,  
367 whereas they were  $<0.5 \mu\text{M}$  at most other stations. By contrast, in Apr/May, nitrate and  
368 phosphate were more uniformly distributed across the north-south transect, and the nitrate  
369 maxima were positioned at approximately 100 m across the lake (Fig. 2 h, j). A local  
370 nitrate maximum (4.7  $\mu\text{M}$ ) at 40 m at station 3 in Apr/May may have been caused by an  
371 overlying cyanobacterial bloom (Ehrenfels et al. 2021). The upward tilting thermocline in  
372 the south enhanced the nutrient transport to the productive surface waters during both  
373 campaigns. However, the tilting of the thermocline as well as surface nitrate and  
374 phosphate concentrations in the south, were lower in Apr/May than in Sep/Oct (Fig. 2 c,  
375 d, g, h, i, j).

376

*Linking hydrodynamics to regional fish populations in Lake Tanganyika*

377 **3.2 Concentration and isotopic composition of DIC and CO<sub>2</sub> fixation**

378 **rates in April/May**

379 In Apr/May, we determined the DIC concentration (stations 2, 5 and 7) and C isotopic  
380 composition (stations 1, 3 and 8) in the north and the south. Like other biogeochemical  
381 parameters, neither the concentration, nor the  $\delta^{13}\text{C}$  of DIC showed strong latitudinal  
382 trends in Apr/May (Fig. 3), but both do exhibit pronounced vertical gradients. The DIC  
383 concentration varied between 70 and 72 mg C L<sup>-1</sup> in the productive upper 50 m, followed  
384 by a sharp increase to about 74 mg C L<sup>-1</sup> that flattened out with increasing depth.  
385 Concurrently, the  $\delta^{13}\text{C}$ -DIC values reached their maximum near the surface (2.1 ‰),  
386 decreased to 0.8 ‰ at the boundary between the metalimnion and the upper hypolimnion  
387 (100-150 m) and showed a further trend to slightly heavier values at greater depth.

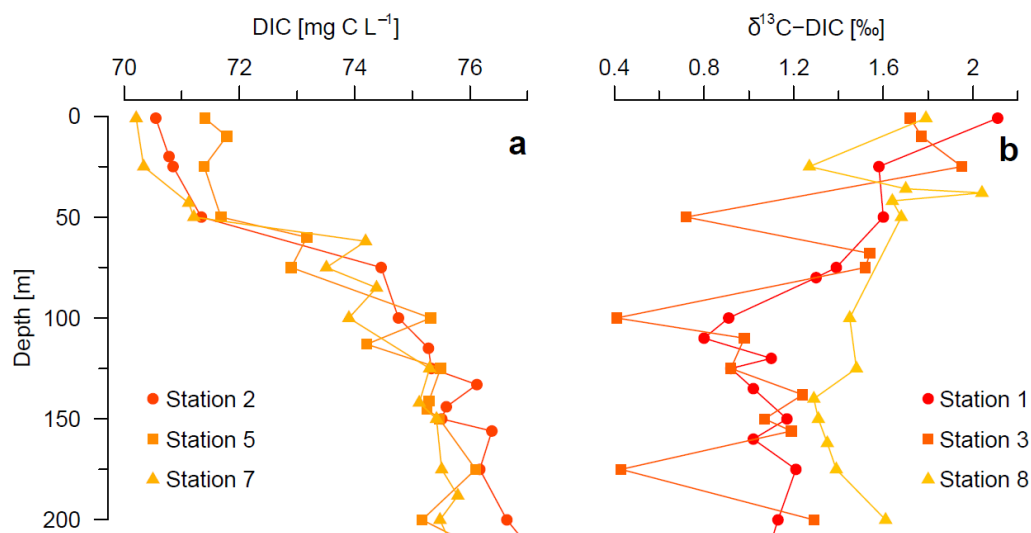

388  
389 **Fig. 3:** (a) Dissolved inorganic carbon (DIC) concentration profiles from stations 2, 5, and 7. (b)  $\delta^{13}\text{C}$ -DIC  
390 profiles from stations 1, 3, and 8 at the end of the rainy season (Apr/May 2018).

*Linking hydrodynamics to regional fish populations in Lake Tanganyika*

391 In addition, we performed CO<sub>2</sub> fixation experiments at station 2 in the north and station 7  
392 in the south (Fig. 4). At both stations, CO<sub>2</sub> fixation rates were highest in the euphotic  
393 zone. CO<sub>2</sub> fixation rates in the top 50 m were higher at station 7 in the upwelling-driven  
394 south (0.58-1.60 μM C d<sup>-1</sup>), compared to station 2 in the permanently stratified north  
395 basin (0.12-0.48 μM C d<sup>-1</sup>).

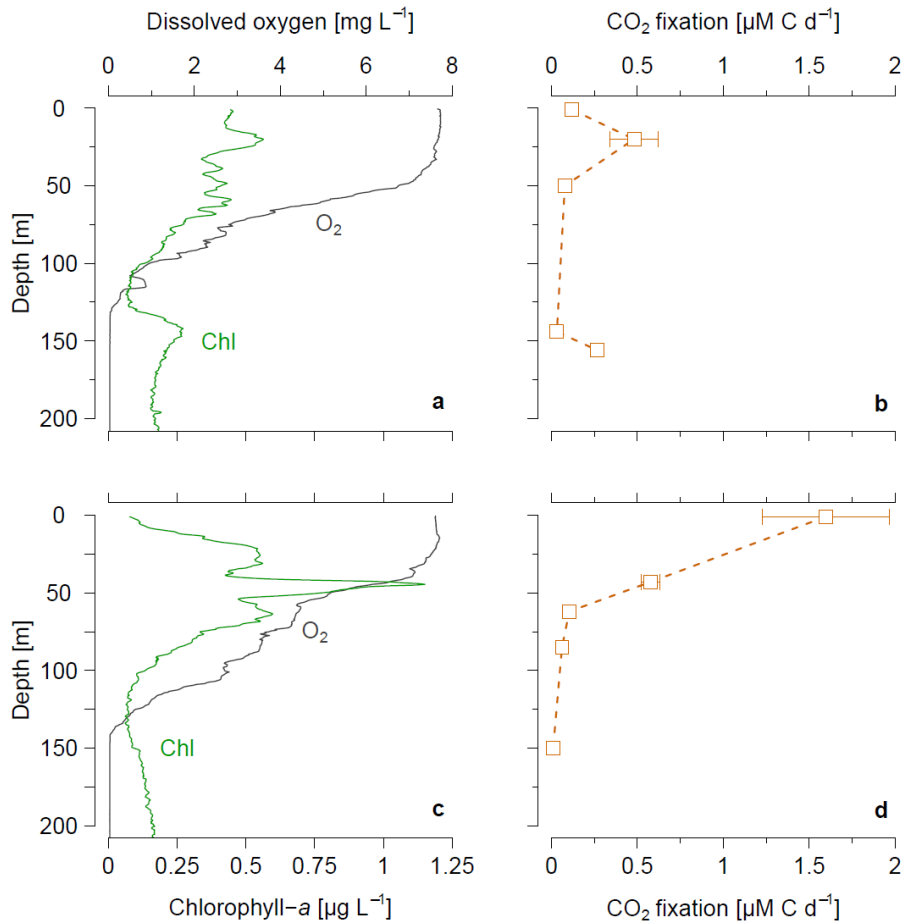

396  
397 **Fig. 4:** Oxygen and in-situ chlorophyll-*a* (a,c), and CO<sub>2</sub> fixation rates (b,d) from stations 2 (a,b) and 7  
398 (c,d) in Apr/May.

*Linking hydrodynamics to regional fish populations in Lake Tanganyika*

399 **3.3 Particulate matter, phytoplankton, and zooplankton**

400 The abundance of medium- to large-celled phytoplankton ( $>10 \mu\text{m}$ ) decreased  
401 significantly from north to south by 2.6 and  $4.4 \cdot 10^8$  ind.  $\text{m}^{-2}$  per degree latitude (linear  
402 regression,  $p < 0.05$ ) in Sep/Oct and Apr/May, respectively (Fig. 5 a, b). Chlorophyll-*a*  
403 was slightly higher in Sep/Oct compared to Apr/May (on average 46 versus 41 mg chl-*a*  
404  $\text{m}^{-2}$ ), and generally showed the highest values in the south during both campaigns (Fig. 5  
405 a, b).

406 We observed strong differences in  $\delta^{13}\text{C}$ -POM between the two campaigns (Fig. 5 c, d). In  
407 Sep/Oct, the values of  $\delta^{13}\text{C}$ -POM varied between -26.5 and -24.9 ‰, whereas they  
408 spanned from -32.3 to -30.1 ‰ in Apr/May. During both seasons, we observed an  
409 increase from north to south of  $\sim 0.3$  ‰ (linear regression,  $p < 0.1$ ) and  $\sim 0.7$  ‰ (linear  
410 regression,  $p < 0.01$ ) per degree latitude in Sep/Oct and Apr/May, respectively. The  $\delta^{15}\text{N}$   
411 of POM was substantially higher in Sep/Oct, with an average of  $1.5 \pm 1.0$  ‰ (Fig. 5 c). In  
412 Apr/May, values were lower (mean:  $0.2 \pm 1.3$  ‰) and increased from the north (station 3:  
413 -1.0 ‰) to the south (station 9: 2.7 ‰; Fig. 5 d).

414 The patterns in zooplankton abundance and  $\delta^{13}\text{C}$  were different from those observed in  
415 phytoplankton and POM (Fig. 5 e, f). The zooplankton abundances were up to one order  
416 of magnitude higher in Sep/Oct versus Apr/May, whereby this temporal change was less  
417 pronounced in the north and center of the lake. In Sep/Oct, zooplankton abundances  
418 reached a lake-wide maximum in the south ( $29.9$  and  $1.9 \cdot 10^3$  ind.  $\text{m}^{-2}$  for the  $95 \mu\text{m}$  and  
419  $250 \mu\text{m}$  size fractions, respectively) and a secondary peak of large zooplankton ( $250 \mu\text{m}$ )

*Linking hydrodynamics to regional fish populations in Lake Tanganyika*

420 in the northern part of the lake ( $1.3 \cdot 10^3$  ind.  $m^{-2}$ ). In Apr/May, the abundances from both  
421 net types varied only slightly across the lake, reaching up to 2.0 and  $0.5 \cdot 10^3$  ind.  $m^{-2}$  for  
422 the 95  $\mu m$  and 250  $\mu m$  size fractions, respectively (Fig. 5 f). Zoo- and phytoplankton  
423 abundances were negatively correlated in Sep/Oct, i.e. phytoplankton ( $>10 \mu m$ )  
424 decreased, when zooplankton increased ( $\rho = -0.58$ ,  $p \sim 0.1$ , Spearman's rank  
425 correlation). No significant correlation between phyto- ( $>10 \mu m$ ) and zooplankton was  
426 found in Apr/May ( $\rho = 0.38$ ,  $p > 0.3$ , Spearman's rank correlation).

427 The zooplankton  $\delta^{13}C$  values changed slightly between the seasons. In Apr/May, both  
428 size fractions were  $\sim 0.6$  ‰ heavier compared to zooplankton from Sep/Oct, opposite of  
429 what we found in POM. Overall, zooplankton  $\delta^{13}C$  lie between -24.7 and -21.1 ‰ (Fig. 5  
430 g, h). In Sep/Oct, we observed a trend towards higher values in the south ( $\Delta +1$  ‰ for  
431 both net types), whereas the highest values in Apr/May occurred towards the northern (-  
432 22.1 ‰) and southern (-21.1 ‰) extremities of the lake, with a minimum of -24.0 ‰ in  
433 the central region. The zooplankton  $\delta^{15}N$  values tended to be higher in the 250  $\mu m$   
434 compared to the 95  $\mu m$  fraction. Overall, they were similar between the campaigns, but  
435 showed generally lower values in the north (2.5-6.3 ‰) compared to the center and the  
436 south (3.2-10.4 ‰; Fig. 5 i, j).

437 The zooplankton community composition was dominated by copepods (Fig. S3). In  
438 Sep/Oct, cyclopoids dominated the small size fraction (on average 66 and 78 % for 25  
439 and 95  $\mu m$ , respectively), whereas calanoids were prevalent in the 250  $\mu m$  fraction  
440 (mean: 74 %). In Apr/May, calanoid copepods dominated the zooplankton community  
441 throughout all size fraction, but the relative abundance of cyclopoids was highest in the



Linking hydrodynamics to regional fish populations in Lake Tanganyika

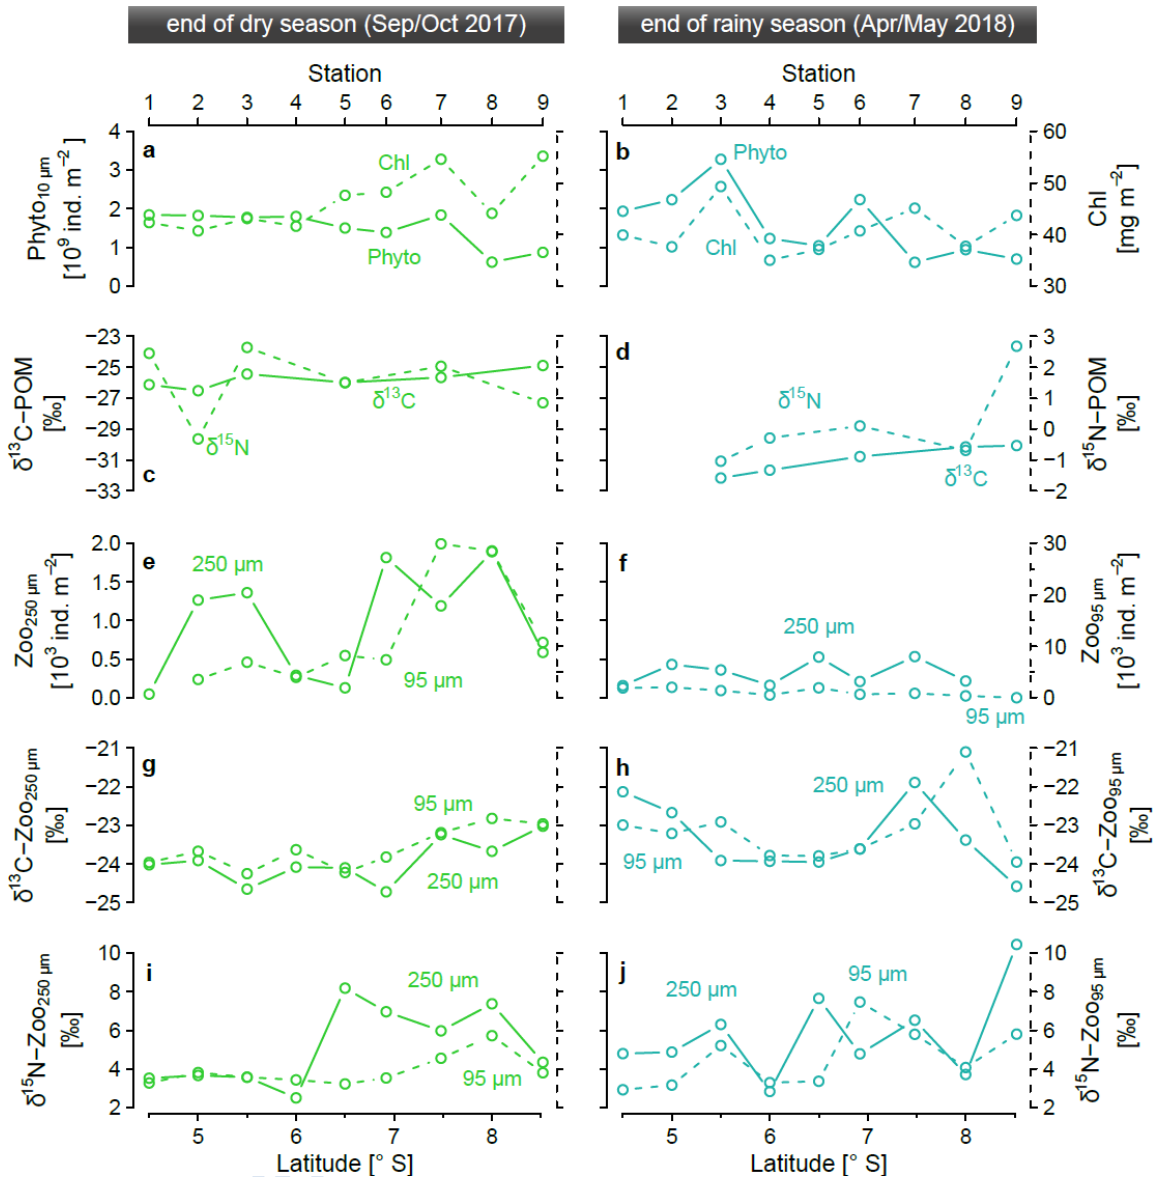

442

443 **Fig. 5:** Different plankton parameters sampled across the epi- and metalimnion (0-125 m) along the north-  
 444 south transects at **(left)** the end of the rainy season and **(right)** the end of the dry season. **(a,b)** Depth-  
 445 integrated phytoplankton abundances (>10 μm) and chlorophyll-*a* stocks. **(c,d)** Depth-integrated and  
 446 phytoplankton abundance-weighted  $\delta^{13}\text{C}$  and  $\delta^{15}\text{N}$  of POM. **(e,f)** Depth-integrated abundances of the 95 μm  
 447 and 250 μm size fractions of the zooplankton community. **(g,h)**  $\delta^{13}\text{C}$  and **(i,j)**  $\delta^{15}\text{N}$  of the 95 μm and 250 μm  
 448 size fractions of the zooplankton community.

449 small size fractions here, too (up to 78 % in the north basin). The freshwater jellyfish  
 450 *Limnocnida tanganyicae medusa* appeared in higher relative abundances in Sep/Oct,



## *Linking hydrodynamics to regional fish populations in Lake Tanganyika*

451 especially in the 250  $\mu\text{m}$  size fraction, reaching up to 19 % at station 7. The contributions  
452 of shrimps to the total zooplankton community was low in our samples, reaching its  
453 highest values in the south during both seasons (max. 16 %). Fish and insect larvae were  
454 rare in all our samples (<1 %).

455 Overall, we find that the phytoplankton abundances (>10  $\mu\text{m}$ ) decreased towards the  
456 south, whereas chlorophyll-*a* and zooplankton reached the highest values in the south.  
457 Zooplankton  $\delta^{13}\text{C}$  and  $\delta^{15}\text{N}$  were variable, but also showed the highest values in the  
458 south. The southward increase was more expressed in POM  $\delta^{13}\text{C}$  and  $\delta^{15}\text{N}$ . In addition,  
459 POM  $\delta^{13}\text{C}$  and  $\delta^{15}\text{N}$  were generally heavier in Sep/Oct compared to Apr/May.

460

### 461 **3.4 Isotopic and elemental composition of bivalve and fish populations**

#### 462 **3.4.1 Variations in $\delta^{13}\text{C}$ and $\delta^{15}\text{N}$**

463 The  $\delta^{13}\text{C}$  of *P. spekii* revealed a consistent seasonal and latitudinal dynamic (Fig. 6 a, b).  
464 We found a significant divergence between northern and southern populations in Sep/Oct  
465 (mean -22.5 and -21.4 ‰, respectively; Mann-Whitney U test,  $p < 0.01$ ), whereas the  
466  $\delta^{13}\text{C}$  values of the *P. spekii* samples from the two basins overlapped in Apr/May (means  
467 of -22.7 and -22.3 ‰, respectively), with northern samples nesting fully within the range  
468 of southern samples. The samples from the northern basin showed little variation between  
469 the seasons, whereas samples collected in the southern basin differed significantly  
470 (Mann-Whitney U test,  $p < 0.001$ ).

471 In Sep/Oct, the mean  $\delta^{13}\text{C}$  values of the populations of the largely planktivorous sardines  
472 *Stolothrissa* and *Limnothrissa* as well as the zooplankti- and piscivorous *Lates stappersii*

*Linking hydrodynamics to regional fish populations in Lake Tanganyika*

473 diverged significantly (Mann-Whitney U tests,  $p < 0.001$ ) by approximately 0.7 ‰  
474 between the north and the south (Fig. 6 c, e, g). By contrast, the differences in mean  
475 values were completely erased or going slightly into the opposite direction in Apr/May  
476 (Fig. 6 d, f, h).

477 Moreover, the southern populations of all three species exhibited the highest  $\delta^{13}\text{C}$  with  
478 mean values of -20.7 ‰, -20.3 ‰, and -20.4 ‰ for *Stolothrissa*, *Limnothrissa*, and *Lates*  
479 *stappersii*, respectively. By contrast, the  $\delta^{13}\text{C}$  of the northern population in Sep/Oct was  
480 similar to the population-wide averages from both basins in Apr/May and never differed  
481 by more than 0.4 ‰. The lowest mean values were consistently observed in Apr/May (-  
482 21.5 ‰, -21.0 ‰, and -21.2 ‰ for *Stolothrissa*, *Limnothrissa*, and *Lates stappersii*,  
483 respectively).

484 In contrast to *P. spekii* and *Stolothrissa*, the southern populations of *Limnothrissa* and  
485 *Lates stappersii* showed 0.2 and 0.4 ‰ lower  $\delta^{13}\text{C}$  values compared to the northern one  
486 in Apr/May, respectively. This difference was not significant for *Limnothrissa* (Mann-  
487 Whitney U test,  $p > 0.05$ ) and was significant for *Lates stappersii* (Mann-Whitney U test,  
488  $p < 0.001$ ). It is worth noting that samples of *Limnothrissa* and *Lates stappersii* from  
489 Apr/May included in our analysis were slightly unbalanced, with samples from the north  
490 being larger compared to samples from the south (Fig. S2). Since larger individuals in  
491 these two species tend to have less depleted  $\delta^{13}\text{C}$  values (Fig. S4 c, e), the  $\delta^{13}\text{C}$  values of  
492 the northern populations, and with them the difference between the basins, are slightly  
493 overestimated here.

Linking hydrodynamics to regional fish populations in Lake Tanganyika

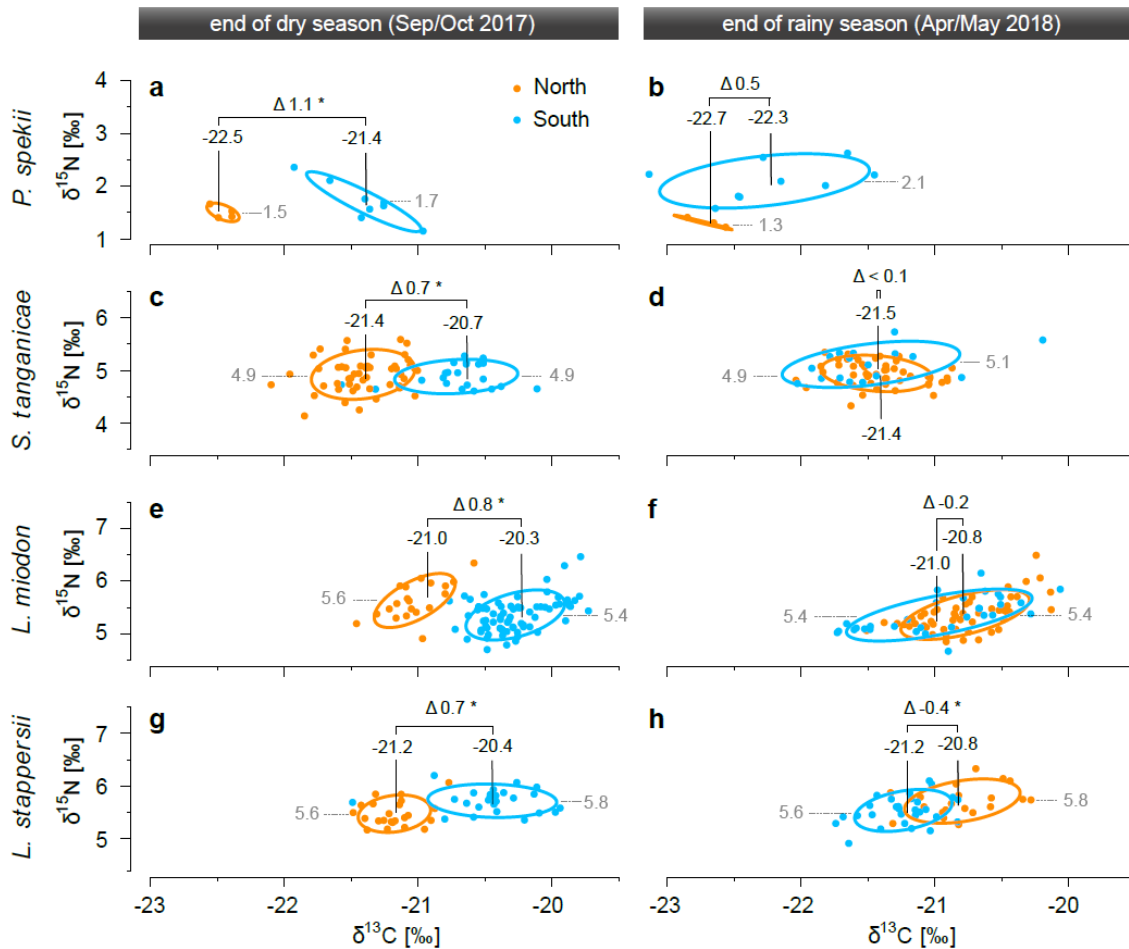

494

495 **Fig. 6:** Carbon (normalized for C:N mass ratio according to Post et al., 2007) and nitrogen stable isotope  
 496 signatures of the major pelagic food web members, namely (a,b) the bivalve *Pleiodon spekii* as well as the  
 497 fish (c,d) *Stolothrissa tanganicae* (e,f) *Limnothrissa miodon* and (g,h) *Lates stappersii* at the end of the dry  
 498 season (left) and the end of the rainy season (right). Orange dots represent the northern basin (stations 1  
 499 and 2) and blue dots represent the southern basin (stations 7 and 9). Numbers indicate the mean  $\delta^{13}\text{C}$   
 500 (black) and  $\delta^{15}\text{N}$  (grey) of a population and  $\Delta$  denotes the  $\delta^{13}\text{C}$  difference between the southern and  
 501 northern populations. Significant differences in  $\delta^{13}\text{C}$  are marked by stars. Ellipses encompass  
 502 approximately 95 % of the data of each population. Note different y-axis limits.

503 We had fewer samples of the large predators *Lates microlepis*, *Lates mariae*, and *Lates*  
 504 *angustifrons*, preventing an in-depth statistical analysis, but the results hint at similar  
 505 patterns. Across our entire data set, these three species showed the highest  $\delta^{13}\text{C}$  values,

*Linking hydrodynamics to regional fish populations in Lake Tanganyika*

506 with most observations being heavier than -21 ‰ (Figs. S4 g, i, k; S5). In Sep/Oct, the  
507  $\delta^{13}\text{C}$  of both *Lates microlepis* and *Lates angustifrons* specimens were >0.5 ‰ lighter than  
508 the individuals from the southern populations. In Apr/May, samples from both the north  
509 and south basins were only available for *Lates mariae*. Here, the  $\delta^{13}\text{C}$  values from both  
510 basins varied within the same range and their averages differed only slightly (north: -20.1  
511 ‰; south: -20.3 ‰).

512 Similar to zooplankton and POM *P. spekii* showed consistently higher  $\delta^{15}\text{N}$  values in the  
513 southern basin, reaching 1.7 and 2.1 ‰ on average in Sep/Oct and Apr/May, respectively,  
514 compared to the northern basin with averages of 1.5 and 1.3 ‰, for the two campaigns  
515 (Fig. 6 a, b). In contrast to  $\delta^{13}\text{C}$ , we observed no systematic seasonal or regional  
516 differences in fish  $\delta^{15}\text{N}$  (Figs. 6 c-h; S5). *Stolothrissa* exhibited the lowest values with  
517 population averages spanning from 4.9 to 5.1 ‰. The other sardine, *Limnothrissa*, had  
518 markedly higher values (means: 5.4-5.6 ‰). Most observations ranged between 4-6 ‰  
519 and 4.5-6.5 ‰ for the two species, respectively (Fig. S4 b, d), whereby the variability  
520 appeared to be neither related to site nor season, and only to a small extent to size. By  
521 contrast, the  $\delta^{15}\text{N}$  of the larger *Lates* species were primarily related to size (Fig. S4 f, h, j,  
522 l). Individuals smaller than 200-250 mm showed an increase from <4 ‰ up to around 6-8  
523 ‰, which then flattened out at these high values for specimens >250 mm. In the >250  
524 mm size class, the  $\delta^{15}\text{N}$  of *Lates stappersii* and *Lates microlepis* never exceeded 7.5 ‰,  
525 whereas *Lates mariae* and *Lates angustifrons* reached values of >8 ‰ (Fig. S4 f, h, j, l).  
526 None of the *Lates* species revealed clear population-wide differences in  $\delta^{15}\text{N}$  between the  
527 basins or seasons (Figs. 6 g, h; S5).

## *Linking hydrodynamics to regional fish populations in Lake Tanganyika*

528 Overall, we find that the different fish species and *P. spekii* revealed congruent patterns  
529 in  $\delta^{13}\text{C}$  with diverging northern and southern populations when upwelling/mixing in the  
530 south were strongest, i.e. at the end of the dry season in Sep/Oct. By contrast,  $\delta^{13}\text{C}$  values  
531 converged, and were generally lower, when the lake was more heavily and homogeneously  
532 stratified, i.e. at the rainy season-dry season transition (Apr/May). On the contrary, the  
533 fish populations exhibited no clear basin-scale trends in  $\delta^{15}\text{N}$ , whereas *P. spekii* showed  
534 slightly higher values in the south during both seasons.

535

### 536 **3.4.2 C:N ratios and estimated lipid content**

537 We observed strong changes in C:N ratios between Sep/Oct and Apr/May at lower and  
538 middle trophic levels, but not at high trophic levels; there were no clear differences  
539 between north and south in all organisms (Fig. 7). *Pleiodon spekii* and zooplankton  
540 showed consistently lower C:N ratios in Sep/Oct compared to Apr/May (Fig. 7 a, c, e),  
541 but the low sample size ( $n \geq 3$ ) ruled out a statistical analysis. We observed the largest  
542 seasonal change in zooplankton (250  $\mu\text{m}$ ) from the southern basin. The medians differed  
543 between 5.1 (Sep/Oct) and 6.8 (Apr/May). The differences were smaller in *P. spekii*,  
544 revealing an overall minimum median of 3.9 in the northern basin in Sep/Oct and a  
545 maximum of 4.3 in the southern basin in Apr/May.

546 Contrary to the trends in *P. spekii* and zooplankton, the sampled fish species showed a  
547 tendency towards higher C:N ratios in Sep/Oct (Fig. 7 b, d, f). This trend vanished with  
548 increasing trophic level of the fish species. The C:N ratios of the planktivorous clupeid  
549 *Stolothrissa* decreased significantly (Mann-Whitney U tests,  $p < 0.001$ ) between Sep/Oct

*Linking hydrodynamics to regional fish populations in Lake Tanganyika*

550 and Apr/May in both the northern and southern basins (medians of 3.65 versus 3.24 and  
 551 3.49 versus 3.19, respectively). *Limnothrissa* revealed significant changes in the north  
 552 (Sep/Oct median: 3.23; Apr/May median: 3.18; Mann-Whitney U test,  $p < 0.001$ ),  
 553 whereas the pattern was reversed and insignificant in the south (Sep/Oct median: 3.19;  
 554 Apr/May median: 3.21; Mann-Whitney U test,  $p > 0.1$ ). By contrast, the C:N ratios of  
 555 *Lates stappersii* varied only within a narrow range, with medians spanning from 3.18 to  
 556 3.21 and no significant differences between seasons (Mann-Whitney U tests,  $p > 0.1$ ).

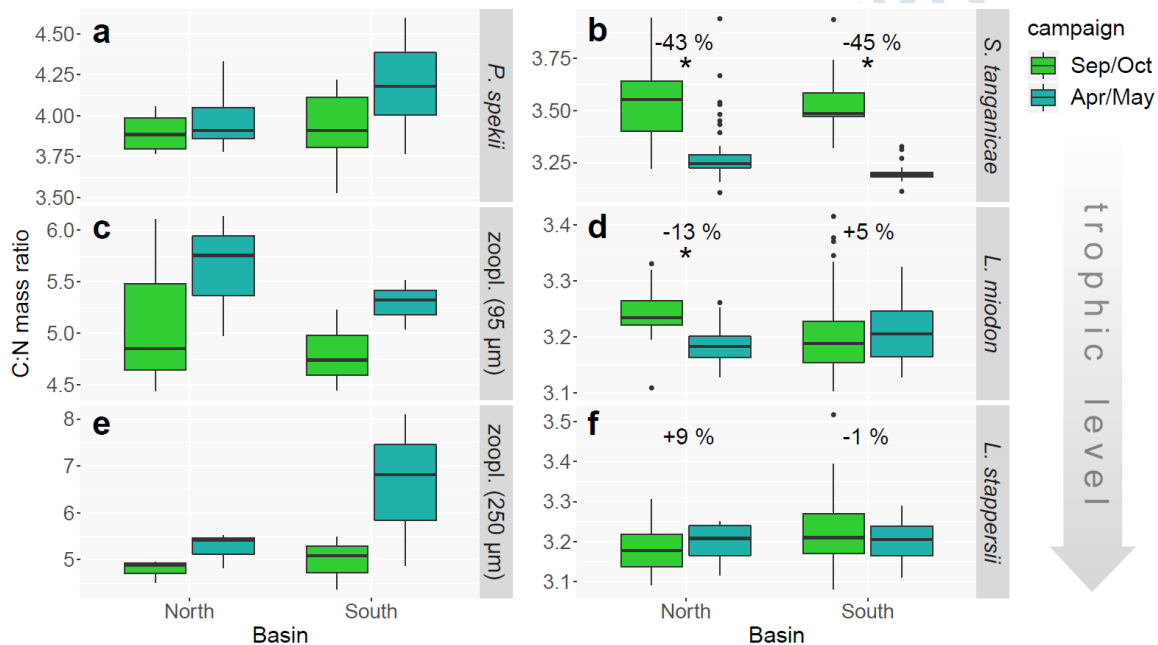

557  
 558 **Fig. 7:** Mass C:N ratios of primary consumers (**a:** *Pleiodon spekkii* and **c, e:** zooplankton) and fish tissue (**b:**  
 559 *Stolothrissa tanganicae*, **d:** *Limnothrissa miodon*, **f:** *Lates stappersii*) for the different sampling campaigns  
 560 and basins of Lake Tanganyika. Stars indicate significant differences between campaigns and numbers  
 561 depict the % change in estimated lipid content according to Post et al. (2007). Note varying y-axis scaling.  
 562 Using the model from Post et al. (2007), we estimated the lipid contents in the dorsal  
 563 muscle tissue of the investigated fish species from their C:N ratios. This analysis suggests  
 564 a reduction of lipid content in *Stolothrissa* from Sep/Oct to Apr/May by 43 and 45 % in

## *Linking hydrodynamics to regional fish populations in Lake Tanganyika*

565 the north and south, respectively. *Limnothrissa* exhibited a 13 % decrease (north) and a 5  
566 % increase (south). *Lates stappersii* showed the lowest differences with a 9 % increase  
567 (north) and 1 % decrease (south). A gravimetric determination of lipid content from  
568 selected *Stolothrissa* samples confirmed that higher C:N ratios translate into higher lipid  
569 contents (linear regression,  $R^2 = 0.91$ ,  $p < 0.01$ ,  $n = 5$ ; Fig. S6).

570

## 571 **4 Discussion**

### 572 **4.1 Effect of upwelling and mixing on the isotopic composition of the** 573 **planktonic food web**

574 Upwelling and convective mixing moderate the transport of nutrients to the surface  
575 waters, and thus drive biological productivity during the dry season in Lake Tanganyika.  
576 In this study, we compare two contrasting hydrodynamic situations: First, the period of  
577 re-establishing water column stratification at the end of the dry season (Sep/Oct). During  
578 this time, stratification was weaker and the thermocline was still absent at the  
579 southernmost station, enabling particularly high nutrient fluxes in the south. Second, the  
580 period of lake-wide stratification at the rainy season-dry season transition (Apr/May).  
581 Here, the water column experienced stronger stratification from the preceding rainy  
582 season and beginning trade winds initiated the upwelling in the south, resulting in overall  
583 lower nutrient fluxes with a maximum in the south. Our data show that upwelling and  
584 mixing do not only influence biological productivity, but also impact the isotopic  
585 composition of all food web members, likely owing to differences in primary

*Linking hydrodynamics to regional fish populations in Lake Tanganyika*

586 productivity and N acquisition pathways of phytoplankton. Such systematic changes can  
587 be used to delineate regional fish populations.

588 In contrast to the southward increase in nutrient availability, we detected a southward  
589 decrease in the abundance of large-sized phytoplankton ( $>10\ \mu\text{m}$ ) a pattern that has  
590 previously been observed in Lake Tanganyika (De Wever et al. 2005), pointing out  
591 additional ecological controls, such as zooplankton grazing or competition within the  
592 phytoplankton community. In Lake Tanganyika, the nano- and pico size fractions ( $<10$   
593  $\mu\text{m}$ ) are more competitive under nutrient-rich conditions and therefore dominate the  
594 phytoplankton community in south (De Wever et al. 2008; Descy et al. 2010). As a result  
595 of their high densities, total phytoplankton abundance and biomass is generally highest  
596 during the dry season upwelling in the south (Hecky and Kling 1981; Stenuite et al. 2009;  
597 Bergamino et al. 2010).

598 In addition, upwelling/mixing and the subsequent stimulation of primary productivity,  
599 place important bottom-up control on the abundances of zooplankton in Lake  
600 Tanganyika. This was evidenced by high zooplankton abundances in the dry season with  
601 maxima in the southern basin (Fig. 5 e; Rufli & Chapman, 1976; Kurki *et al.*, 1999),  
602 which in turn sustain the growth of the pelagic fish populations, especially the sardine  
603 species (Coulter 1991; Kimirei and Mgaya 2007; Plisnier et al. 2009; Cirhuza and  
604 Plisnier 2016). The high zooplankton abundances can in turn exert top-down control over  
605 phytoplankton, which is indicated by the negative correlation between the phytoplankton  
606 ( $>10\ \mu\text{m}$ ) and zooplankton abundances in Sep/Oct. This grazing effect may have also  
607 been responsible for the absence of strong differences in chlorophyll-*a* between Sep/Oct  
608 and Apr/May. Zooplankton abundance, and thus grazing pressure, exhibited no clear



*Linking hydrodynamics to regional fish populations in Lake Tanganyika*

609 latitudinal trend during the April/May campaign, when the lake-wide stratification was  
610 stronger, and the north-south gradients in nutrient availability and biological productivity  
611 were not as pronounced.

612 The varying hydrodynamics were also associated with distinct  $\delta^{13}\text{C}$ -POM signatures that  
613 may reflect differences in primary productivity. The average  $\delta^{13}\text{C}$  was  $\sim 5$  ‰ heavier in  
614 Sep/Oct compared to Apr/May, and the  $\delta^{13}\text{C}$  increased by  $\sim 2$  ‰ from north to south  
615 during both campaigns (Fig. 5 c, d). In Lake Tanganyika, previous studies also revealed  
616 heavier  $\delta^{13}\text{C}$ -POM values in the dry season (O'Reilly et al. 2002; Sarvala et al. 2003;  
617 Salonen et al. 2012), even though the differences were smaller (max. 3.1 ‰) than in our  
618 study (max. 6.7 ‰), possibly due to the varying timing of the sampling. These  
619 differences in  $\delta^{13}\text{C}$ -POM likely reflect the well-documented changes in primary  
620 production (Stenuite et al. 2009; Horion et al. 2010; Mziray et al. 2018), where heavier  
621 isotopic signatures in POM mirror the incorporation of a larger  $^{13}\text{C}$  fraction by higher  
622 photosynthesis and cell growth rates (Bidigare et al. 1997, 1999) and a stronger  
623 drawdown of the DIC pool (Hollander and McKenzie 1991; Gu et al. 1996, 2006; Rau et  
624 al. 1997). The links between stratification, vertical nutrient supply, and primary  
625 productivity in Lake Tanganyika are well established (Verburg et al. 2003, 2006; Verburg  
626 2007; Mziray et al. 2018) and several studies have used the  $\delta^{13}\text{C}$  of sediment POM to  
627 infer primary productivity (O'Reilly et al. 2003; Verburg 2007). Our own  $\text{CO}_2$  fixation  
628 rate measurements, done during Apr/May, show evidence for higher productivity rates in  
629 the southern basin at station 7 in the south compared to station 2 in the north (Fig. 4). On  
630 the other hand, upwelling of intermediate waters will not only supply nutrients, but also  
631 isotopically light DIC (depleted by  $\sim 1$  ‰; Fig. 3; Craig, 1974; Callbeck *et al.*, 2021).

*Linking hydrodynamics to regional fish populations in Lake Tanganyika*

632 Although this mechanism will slightly dilute  $^{13}\text{C}$  enrichment, our proposed mechanism of  
633 higher primary productivity is apparently strong enough to overcome this depletion in  
634  $\delta^{13}\text{C}$ -POM, ultimately leading to higher  $\delta^{13}\text{C}$ -POM when upwelling/mixing is stronger.

635 The analogous pattern in  $\delta^{15}\text{N}$ -POM implies that upwelling and mixing may have  
636 influenced the N sources of primary producers, where lighter values are typically  
637 interpreted as inputs from N fixation (Gu et al. 2006; Morana et al. 2015). POM  $\delta^{15}\text{N}$   
638 values increased from -1.0 ‰ at station 3 to 2.7 ‰ at station 9 in the south in Apr/May,  
639 concurrent with a decrease in filamentous, N-fixing cyanobacteria (Ehrenfels et al. 2021),  
640 whereas it fluctuated with slightly higher values (-0.3-2.6 ‰) in Sep/Oct devoid of a  
641 latitudinal or phytoplankton composition related pattern. We also observed no correlation  
642 between the presence of surface nitrate and  $\delta^{15}\text{N}$ -POM, which may have induced  
643 fractionation effects during nitrate-uptake. When free nitrate remains, the phytoplankton  
644 community does not represent a complete sink of the upward diffusing nitrate, i.e. the  
645 residual nitrate should be isotopically heavy and phytoplankton relatively light. In line  
646 with the higher density of N-fixing cyanobacteria (Hecky and Kling 1981; Descy et al.  
647 2010; Ehrenfels et al. 2021), the generally lighter  $\delta^{15}\text{N}$ -POM in Apr/May ( $\Delta$ -1.4 ‰) point  
648 at higher inputs from N fixation compared to Sep/Oct, when nutrient fluxes are higher  
649 due to upwelling/mixing.

650 The isotopic composition of the zooplankton community did not show clear latitudinal  
651 and seasonal patterns, pointing at additional influencing factors than the signal from the  
652 base of the food web, i.e. POM. The  $\delta^{13}\text{C}$  values in our zooplankton samples oscillated  
653 between -24.7 and -21.1 ‰, in accordance with previous isotope surveys. The  $\delta^{15}\text{N}$

*Linking hydrodynamics to regional fish populations in Lake Tanganyika*

654 values from the north were also in agreement with other studies, whereas the maxima in  
655 the south, where previously no isotopic characterization of the food web was undertaken,  
656 exceeded earlier reports by min. 2.7 ‰ (Fig. 5; O'Reilly et al. 2002; Sarvala et al. 2003;  
657 Salonen et al. 2012; Jessen et al. 2019). The high intra-basin variability in  $\delta^{13}\text{C}$  and  $\delta^{15}\text{N}$   
658 as well as the high absolute values relative to other members of the food web, with some  
659 zooplankton  $\delta^{15}\text{N}$  exceeding top predator fish  $\delta^{15}\text{N}$  values, may be in part attributable to  
660 varying zooplankton community compositions (Sarvala et al. 2003; Jessen et al. 2019).  
661 Such values from a pooled zooplankton sample are not unexpected, because zooplankton  
662 communities consist usually of members from several trophic levels (e.g. Sarvala *et al.*,  
663 2003; Brandl, 2005; Matthews & Mazumder, 2007), and our samples represent batch  
664 samples from entire zooplankton communities formed by many different species, genera,  
665 and families. In addition, the zooplankton community is notoriously hard to sample and  
666 standard netting techniques do not capture fast swimmers such as shrimps efficiently,  
667 therefore often underestimating their abundances (Kurki et al. 1999a). Indeed, shrimps  
668 only made up minor proportions in our samples (Fig. S3) and previous work showed that  
669 they have  $\delta^{13}\text{C}$  and  $\delta^{15}\text{N}$  values lower than our community isotope values (Sarvala et al.  
670 2003; Salonen et al. 2012; Jessen et al. 2019). However, reported  $\delta^{15}\text{N}$  values of  
671 individual zooplankton taxa, including detritivorous jellyfish and fish larvae, do not exceed  
672 5.9 ‰ (Sarvala et al. 2003; Salonen et al. 2012; Jessen et al. 2019) and therefore fail at  
673 explaining the high  $\delta^{15}\text{N}$  in our measured community isotope samples from the south  
674 (>10 ‰). In line with our results, earlier reports of bulk community samples found high  
675  $\delta^{15}\text{N}$  values between 6 and 8 ‰ (O'Reilly et al. 2002), raising questions about the utility  
676 of using bulk community samples. Combining the taxonomic assessment of the

## *Linking hydrodynamics to regional fish populations in Lake Tanganyika*

677 community with an isotopic characterization of individual zooplankton taxa would thus  
678 be valuable in future food web studies.

679 In summary, our results point to a pivotal role of nutrient upwelling and mixing for  
680 sustaining the high biological productivity in the south basin during the dry season.  
681 Upwelling-related increases in primary productivity and decreases in N fixation likely  
682 resulted in markedly heavier planktonic  $\delta^{13}\text{C}$  and slightly heavier  $\delta^{15}\text{N}$  values in the south  
683 (Fig. 8 a). The slightly higher zooplankton  $\delta^{13}\text{C}$  and  $\delta^{15}\text{N}$  values in the southern basin  
684 may reflect the isotopic imprint of the upwelling/mixing, but a clear north-south trend  
685 may be masked to some extent by concomitantly shifting community composition effects.

686

### 687 **4.2 Isotopic imprints from upwelling and mixing reveal regional fish** 688 **populations**

689 The seasonally and regionally varying hydrodynamic conditions also determine the C  
690 isotopic compositions of organisms higher in the food web, through the incorporation of  
691 phyto- and zooplankton prey. Due to the longevity of many organisms higher in the food  
692 web, they integrate the isotopic signals from their food over a longer time span. For  
693 instance, tissue turnover in bivalves is significantly slower than in phyto- and  
694 zooplankton (O'Reilly et al. 2002; Fukumori et al. 2008). Therefore, we used the filter-  
695 feeding bivalve *P. spekii* as a reference organism for the seasonal phytoplankton isotopic  
696 signals. *Pleiodon spekii* lives for at least five years at a stationary location and was  
697 successfully used to record upwelling events in Lake Tanganyika (Langlet et al. 2007).

*Linking hydrodynamics to regional fish populations in Lake Tanganyika*

698 We find that the southern *P. spekii* samples in Sep/Oct diverge significantly in  $\delta^{13}\text{C}$  from  
699 northern samples ( $\Delta 1.1 \text{ ‰}$ ). Lake-wide stratification over the rainy season on the other  
700 hand resulted in converging  $\delta^{13}\text{C}$  values between samples from both basins in Apr/May  
701 (Fig. 6 a, b).

702 Such seasonal cycles in  $\delta^{13}\text{C}$  signals are common in aquatic food webs and propagate  
703 along the trophic chain (Perga and Gerdeaux 2005; Woodland et al. 2012). The typical  
704 muscle half-life ranging from a few weeks in juvenile fish to several months in adults  
705 explains the incorporation of seasonal dietary isotope patterns (Weidel et al. 2011; Xia et  
706 al. 2013; Busst and Britton 2018). Accordingly, we find similar patterns as in *P. spekii* in  
707 the three major pelagic fish species of Lake Tanganyika, with a latitudinal difference of  
708  $\sim 0.7 \text{ ‰}$  heavier fish tissue  $\delta^{13}\text{C}$  in the south (Fig. 6). The aligning  $\delta^{13}\text{C}$  values between  
709 northern and southern samples during the rainy season are again in agreement with the  
710 more uniform primary productivity patterns. Our results point to fish populations  
711 confined to regional foraging grounds in the respective basins, which therefore record the  
712 latitudinal isotope gradients (Fig. 8 b).

713 However, our previous high resolution population genetic work did not find evidence for  
714 genetic differentiation between the north and south basins in any of the six fish taxa  
715 investigated in this study. Instead, populations in the north and south basins are closely  
716 related (De Keyzer et al. 2019; Junker et al. 2020; Rick et al. 2021). The limited genetic  
717 differentiation in these species is not spatially restricted, with the exception of a case in  
718 *Lates mariae*. In Rick et al. (2021), we found one *Lates mariae* cluster confined to the  
719 extreme south end of the lake with strong genetic differentiation from individuals

*Linking hydrodynamics to regional fish populations in Lake Tanganyika*

720 elsewhere in the south basin or in the rest of the lake. Thus, the genetic structure of the  
 721 fish populations cannot be explained by the basin-scale dynamics. This implies that the  
 722 degree of geographical isolation between north and south basins itself is insufficient to  
 723 suppress lake-wide gene flow in these pelagic fish species. In other words, the  
 724 isotopically distinct fish populations can only be regarded as regional on rather short  
 725 seasonal to multiannual time scales (Fig. 8 c).

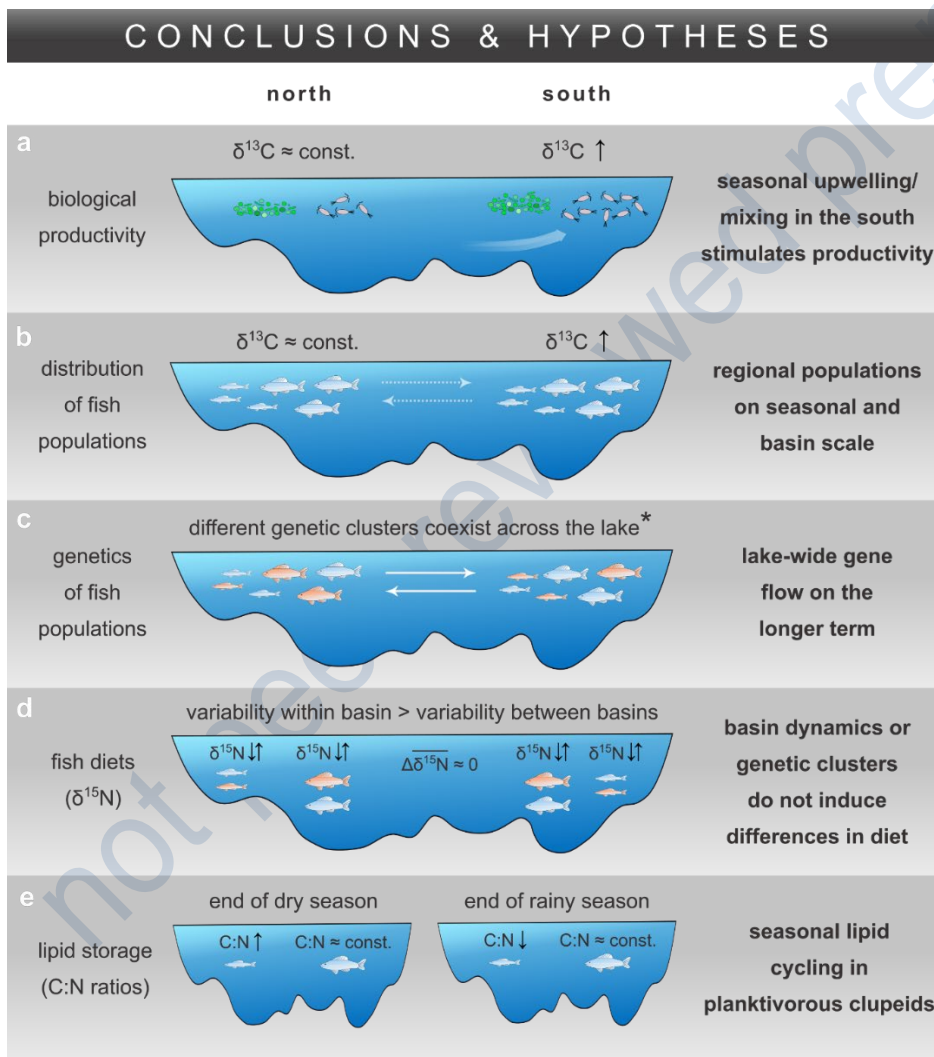

726

727 **Fig. 8:** Sketch synthesizing the main conclusions and hypotheses of the study. (a) Biological productivity  
 728 of phyto- and zooplankton based on abundance and  $\delta^{13}\text{C}$  data, which were used to (b) infer the distribution  
 729 of regional fish populations from their  $\delta^{13}\text{C}$  signatures. (c) The regional isolation of the fish populations is

### *Linking hydrodynamics to regional fish populations in Lake Tanganyika*

730 apparently insufficient to suppress lake-wide gene flow. (d) The regional fish populations as well as  
731 different genetic clusters did not exhibit systematic differences in  $\delta^{15}\text{N}$ . (e) The clupeid *Stolothrissa*  
732 exhibited strong seasonal changes in C:N, i.e. lipid content, indicating lipid storage after the productive dry  
733 season.

734 \*results from Junker et al. (2020) and Rick et al. (2021)

735

### 736 **4.3 Regional fish populations show no differences in $\delta^{15}\text{N}$ or C:N ratios**

737 Despite the absence of pronounced spatial genetic structure in either of the sardine (De  
738 Keyzer et al. 2019; Junker et al. 2020) or *Lates* species (Rick et al. 2021), regional fish  
739 populations may exhibit phenotypic changes in diet or lipid content in response to  
740 regionally different environments, which include a northern region with a more stable  
741 and clear water column and a plankton-rich upwelling region in the south (Plisnier et al.  
742 2009; Bergamino et al. 2010; Verburg et al. 2011).

743 The rather constant average  $\delta^{15}\text{N}$  of the studied fish (deviation  $< 0.2$  ‰) and *P. spekkii*  
744 (deviation  $< 0.8$  ‰) among the sampling campaigns and basins indicates no strong  
745 differences in trophic level between the populations in the different lake basins. However,  
746 the difficulty of quantifying the trophic position of the fish species was exacerbated by  
747 the small differences between the trophic levels. Moreover, the zooplankton community  
748  $\delta^{15}\text{N}$  exhibited strong intra-basin variability, with maxima similar to the highest fish  $\delta^{15}\text{N}$   
749 values, which raises doubt about the usefulness of comparing bulk community with tissue  
750 samples (Mateo et al. 2008). Both the high variability in  $\delta^{15}\text{N}$  between individual  
751 zooplankton taxa (Sarvala et al. 2003; Salonen et al. 2012; Jessen et al. 2019) and



*Linking hydrodynamics to regional fish populations in Lake Tanganyika*

752 unknown trophic discrimination factors (Bastos et al. 2017), which appear to deviate  
753 from the norm in Lake Tanganyika (Sarvala et al. 2003; Jessen et al. 2019), further  
754 aggravate assessing subtle differences in the specific diets. Compound specific isotope  
755 analyses of amino acids may further help constraining the trophic relationships  
756 (Chikaraishi et al. 2009).

757 Nonetheless, on a basin-scale, the relatively consistent fish and *P. spekii*  $\delta^{15}\text{N}$   
758 demonstrate that the isotopic composition of their N sources does not vary substantially  
759 throughout the year and among basins, whereas POM and zooplankton showed some  
760 tendency towards higher values in the south. Instead, larger  $\delta^{15}\text{N}$  variations of up to >2  
761 ‰ among individuals of a similar size found at the same location and time indicate that  
762 other factors than the basin-scale hydrodynamics influence the diets of the studied fish  
763 taxa. We found no clear evidence, however, that differences in  $\delta^{15}\text{N}$  were linked to the  
764 different genetic clusters in *Limnothrissa* or the four *Lates* species (Figs. S7; 8 d).

765 Fish use lipids to store energy during times of abundant food supply to bridge resource  
766 limited periods (Montgomery and Galzin 1993; Arrington et al. 2006). However, in  
767 congruence with the absence of basin-scale genetic structure, we found no regional  
768 differences in C:N ratios as proxy for lipid content (Fig. S6; McConnaughey & McRoy,  
769 1979; Post et al., 2007; Logan et al., 2008), but we did find seasonal changes: the  
770 smallest species, *Stolothrissa*, showed a significantly higher C:N ratio, i.e. lipid content,  
771 at the end of the productive dry season (Fig. 7), which translates to >40 % change in lipid  
772 content according to the model of Post et al. (2007). Seasonal lipid cycling is expected to  
773 be more pronounced in smaller fish, due to higher metabolic rates (Fernandes and



*Linking hydrodynamics to regional fish populations in Lake Tanganyika*

774 McMeans 2019) and their planktivorous diet. While predators, i.e. *Lates stappersii* and  
775 large *Limnothrissa*, feed on both fish and zooplankton, the solely planktivorous  
776 *Stolothrissa* must cope with the strong seasonal fluctuations in plankton productivity.  
777 Thus, *Stolothrissa* may have a life history adapted to building reserves during the  
778 productive dry season for the following rainy season, when resources are less abundant.  
779 Alternatively, the changing C:N may relate to spawning activities (Abdulkarim et al.  
780 2016). However, spawning peaks were reported to occur in September and April-July  
781 (Ellis 1971; Pearce 1985), i.e. during both our sampling occasions (Sep/Oct and  
782 Apr/May), and can thus not explain the observed changes in C:N between those two time  
783 points. The seasonal effect was less pronounced in the slightly larger *Limnothrissa* and  
784 was clearly absent in *Lates stappersii*, possibly due to their larger sizes and more  
785 piscivorous diets (Fig. 8 e). Overall, the  $\delta^{15}\text{N}$  and C:N values indicate similar diets and  
786 lipid contents of the northern and southern fish populations. We hypothesize that the long  
787 term gene flow across the lake may inhibit the development of ecological differences  
788 among the regional fish populations in response to the basin-scale environmental  
789 conditions.

790

## 791 **5 Conclusions**

792 In this study, we showed that the seasonal upwelling and mixing in the south basin of  
793 Lake Tanganyika induce distinct isotopic imprints at the primary producer level. These  
794 distinct isotopic signals can be tracked across the entire pelagic food web. Using  $\delta^{13}\text{C}$  as  
795 tracer, we identified fish populations with regional foraging grounds, implying some

*Linking hydrodynamics to regional fish populations in Lake Tanganyika*

796 degree of isolation on a seasonal and basin-wide scale. Correspondingly, regional fishery  
797 management strategies may include basin-scale quotas. Our elemental and bulk isotopic  
798 composition data provide no clear evidence for strong physiological or dietary  
799 differences among these regional populations. However, highly variable planktonic  $\delta^{15}\text{N}$   
800 values preclude simple trophic chain analyses based on bulk isotopes. To this end,  
801 taxonomically resolved isotope analyses or compound specific isotope analyses of amino  
802 acids may potentially offer more insight. In the context of assessing the vulnerability of  
803 Lake Tanganyika's pelagic food web in a warming climate, our study indicates that the  
804 economically relevant pelagic fish species are genetically adapted to the whole lake  
805 although they form regional populations at the seasonal time scale.

806

807 **Acknowledgements**

808 We are grateful for the support from our research collaborators at the Tanzania Fisheries  
809 Research Institute, particularly the Directors Rashid Tamatamah and Semvua Mzighani  
810 as well as Mary Kishe. Special thanks go to Mupape Mukuli as well as the captain and  
811 crew of the *M/V Maman Benita* for their steady toil in organizing and conducting the  
812 cruise work with us. We also thank Andreas Brand, Kathrin B.L. Baumann, and Tumaini  
813 M. Kamulali for their help during field work, Serge Robert and Fabian Kuhn for  
814 assistance in the lab, and Eliane Scharmin for administrative support. Special thanks go  
815 to Jessica A. Rick for providing help in the field, the data of the *Lates* genetic clusters,  
816 and comments on the manuscript. Thanks to Blake Matthews for insightful discussions.  
817 This work was funded by the Swiss National Science Foundation (grant CR23I2-

*Linking hydrodynamics to regional fish populations in Lake Tanganyika*

818 166589). Thanks to the Tanzania Commission for Science and Technology (COSTECH)  
819 for granting the research permits.

820 The authors declare no conflicts of interest.

821

822 **Author contributions**

823 BE, JJ, OS, CEW, and BW designed the study. BE, JJ, CMC, CD, AK, IAK, ASM, JBM,  
824 and EAS organized and carried out field work. BE, JJ, DN, CMC, AK, ASM, JBM, and  
825 EAS performed laboratory work. BE, JJ, DN, AK, and ASM analyzed the data. BE made  
826 the figures and wrote the paper with substantial contributions from JJ, CMC, IAK, CJS,  
827 OS, CEW, and BW. All authors approved the final submitted manuscript.

828

829 **References**

830 Abdulkarim, B., P. O. J. Bwathondi, and B. L. Benno. 2016. Seasonal variations in the  
831 proximate compositions of five economically-important fish species from Lake  
832 Victoria and Lake Tanganyika, Tanzania. *Bayero J. Pure Appl. Sci.* **9**: 11–18.  
833 doi:10.4314/bajopas.v9i1.3

834 Arrington, D. A., B. K. Davidson, K. O. Winemiller, and C. A. Layman. 2006. Influence  
835 of life history and seasonal hydrology on lipid storage in three neotropical fish  
836 species. *J. Fish Biol.* **68**: 1347–1361. doi:10.1111/j.0022-1112.2006.00996.x

*Linking hydrodynamics to regional fish populations in Lake Tanganyika*

- 837 Bastos, R. F., F. Corrêa, K. O. Winemiller, and A. M. Garcia. 2017. Are you what you  
838 eat? Effects of trophic discrimination factors on estimates of food assimilation and  
839 trophic position with a new estimation method. *Ecol. Indic.* **75**: 234–241.  
840 doi:10.1016/j.ecolind.2016.12.007
- 841 Bergamino, N., S. Horion, S. Stenuite, Y. Cornet, S. Loisel, P. D. Plisnier, and J. P.  
842 Descy. 2010. Spatio-temporal dynamics of phytoplankton and primary production in  
843 Lake Tanganyika using a MODIS based bio-optical time series. *Remote Sens.*  
844 *Environ.* **114**: 772–780. doi:10.1016/j.rse.2009.11.013
- 845 Bidigare, R. R., A. Fluegge, K. H. Freeman, and others. 1997. Consistent fractionation of  
846  $^{13}\text{C}$  in nature and in the laboratory: Growth-rate effects in some haptophyte algae.  
847 *Global Biogeochem. Cycles* **11**: 279–292. doi:10.1029/96GB03939
- 848 Bidigare, R. R., K. L. Hanson, K. O. Buesseler, and others. 1999. Iron-stimulated  
849 changes in  $^{13}\text{C}$  fractionation and export by equatorial Pacific phytoplankton: Toward  
850 a paleogrowth rate proxy. *Paleoceanography* **14**: 589–595.  
851 doi:10.1029/1999PA900026
- 852 Brandl, Z. 2005. *Freshwater Copepods and Rotifers: Predators and their Prey.*  
853 *Hydrobiologia* **546**: 475–489. doi:10.1007/s10750-005-4290-3
- 854 Busst, G. M. A., and J. R. Britton. 2018. Tissue-specific turnover rates of the nitrogen  
855 stable isotope as functions of time and growth in a cyprinid fish. *Hydrobiologia* **805**:  
856 49–60. doi:10.1007/s10750-017-3276-2
- 857 Callbeck, C. M., B. Ehrenfels, K. B. L. Baumann, B. Wehrli, and C. J. Schubert. 2021.

*Linking hydrodynamics to regional fish populations in Lake Tanganyika*

- 858 Anoxic chlorophyll maximum enhances local organic matter remineralization and  
859 nitrogen loss in Lake Tanganyika. *Nat. Commun.* **12**. doi:10.1038/s41467-021-  
860 21115-5
- 861 Chikaraishi, Y., N. O. Ogawa, Y. Kashiya, and others. 2009. Determination of  
862 aquatic food-web structure based on compound-specific nitrogen isotopic  
863 composition of amino acids. *Limnol. Oceanogr. Methods* **7**: 740–750.  
864 doi:10.4319/lom.2009.7.740
- 865 Cirhuza, D. M., and P. Plisnier. 2016. Composition and seasonal variations in abundance  
866 of Copepod (Crustacea) populations from the northern part of Lake Tanganyika.  
867 *Aquat. Ecosyst. Heal. Manag.* **4988**: 401–410. doi:10.1080/14634988.2016.1251277
- 868 Close, H. G., and L. C. Henderson. 2020. Open-ocean minima in  $\delta^{13}\text{C}$  values of  
869 particulate organic carbon in the lower euphotic zone. *Front. Mar. Sci.* **7**: 540165.  
870 doi:10.3389/fmars.2020.540165
- 871 Cocquyt, C., and W. Vyverman. 2005. Phytoplankton in Lake Tanganyika: a Comparison  
872 of Community Composition and Biomass off Kigoma with Previous Studies 27  
873 Years Ago. *J. Great Lakes Res.* **31**: 535–546. doi:10.1016/S0380-1330(05)70282-3
- 874 Cohen, A. S., E. L. Gergurich, B. M. Kraemer, M. M. McGlue, P. B. McIntyre, J. M.  
875 Russell, J. D. Simmons, and P. W. Swarzenski. 2016. Climate warming reduces fish  
876 production and benthic habitat in Lake Tanganyika, one of the most biodiverse  
877 freshwater ecosystems. *Proc. Natl. Acad. Sci. U. S. A.* **113**: 9563–8.  
878 doi:10.1073/pnas.1603237113

*Linking hydrodynamics to regional fish populations in Lake Tanganyika*

- 879 Cornelissen, I. J. M., J. Vijverberg, A. M. van den Beld, N. R. Helmsing, J. A. J. Verreth,  
880 and L. A. J. Nagelkerke. 2018. Heterogeneity in food-web interactions of fish in the  
881 Mwanza Gulf, Lake Victoria: a quantitative stable isotope study. *Hydrobiologia* **805**:  
882 113–130. doi:10.1007/s10750-017-3297-x
- 883 Coulter, G. W. 1970. Population changes within a group of fish species in Lake  
884 Tanganyika following their exploitation. *J. Fish Biol.* **2**: 329–353.
- 885 Coulter, G. W. 1991. *Lake Tanganyika and its life.*, British Museum of Natural History,  
886 London and Oxford University Press, Oxford.
- 887 Craig, H. 1974. *Lake Tanganyika geochemical and hydrographic study: 1973 expedition.*  
888 SIO Ref. Ser. **75**.
- 889 Descy, J. P., M. A. Hardy, S. Sténuite, and others. 2005. Phytoplankton pigments and  
890 community composition in Lake Tanganyika. *Freshw. Biol.* **50**: 668–684.  
891 doi:10.1111/j.1365-2427.2005.01358.x
- 892 Descy, J. P., A. L. Tarbe, S. Stenuite, and others. 2010. Drivers of phytoplankton  
893 diversity in Lake Tanganyika. *Hydrobiologia* **653**: 29–44. doi:10.1007/s10750-010-  
894 0343-3
- 895 Ehrenfels, B., M. Bartosiewicz, A. S. Mbonde, and others. 2021. Diazotrophic  
896 cyanobacteria are associated with a low nitrate resupply to surface waters in Lake  
897 Tanganyika. *Front. Environ. Sci.* **9**: 277. doi:10.3389/fenvs.2021.716765
- 898 Ehrenfels, B., A. S. Mbonde, C. Dinkel, A. Brand, K. B. L. Baumann, J. Junker, and B.

*Linking hydrodynamics to regional fish populations in Lake Tanganyika*

- 899 Wehrli. 2020. Physical, biogeochemical, and biological data for Lake Tanganyika  
900 (2017–2018). ETH Res. Collect. **Dataset**. doi:10.3929/ethz-b-000418479
- 901 Ellis, C. M. A. 1971. The size at maturity and breeding seasons of sardines in southern  
902 Lake Tanganyika. *African J. Trop. Hydrobiol. Fish.* **1**: 59–66.
- 903 Fernandes, T., and B. C. McMeans. 2019. Coping with the cold: energy storage strategies  
904 for surviving winter in freshwater fish. *Ecography (Cop.)*. **42**: 2037–2052.  
905 doi:10.1111/ecog.04386
- 906 Folch, J., M. Lees, and G. H. Sloane-Stanley. 1957. A simple method for the isolation  
907 and purification of total lipids from animal tissues. *J. Biol. Chem.* **226**: 497–509.
- 908 Fry, B. 2006. *Stable isotope ecology*, Springer, New York.
- 909 Fukumori, K., M. Oi, H. Doi, and others. 2008. Bivalve tissue as a carbon and nitrogen  
910 isotope baseline indicator in coastal ecosystems. *Estuar. Coast. Shelf Sci.* **79**: 45–50.  
911 doi:10.1016/j.ecss.2008.03.004
- 912 Grasshoff, K., K. Kremling, and M. Ehrhardt. 1999. *Methods of seawater analysis*,  
913 Wiley, New York.
- 914 Gu, B., A. D. Chapman, and C. L. Schelske. 2006. Factors controlling seasonal variations  
915 in stable isotope composition of particulate organic matter in a soft water eutrophic  
916 lake. *Limnol. Oceanogr.* **51**: 2837–2848. doi:10.4319/lo.2006.51.6.2837
- 917 Gu, B., C. L. Schelske, and M. Brenner. 1996. Relationship between sediment and  
918 plankton isotope ratios ( $\delta^{13}\text{C}$  and  $\delta^{15}\text{N}$ ) and primary productivity in Florida lakes.

*Linking hydrodynamics to regional fish populations in Lake Tanganyika*

- 919 Can. J. Fish. Aquat. Sci. **53**: 875–883. doi:10.1139/f95-248
- 920 Hecky, R. E., E. J. Fee, H. Kling, and J. W. M. Rudd. 1978. Studies on the planktonic  
921 ecology of Lake Tanganyika. Winnipeg, Man. West. Reg. Fish. Mar. Serv.
- 922 Hecky, R. E., and H. J. Kling. 1981. The phytoplankton and protozooplankton Lake  
923 Tanganyika: Species composition, biomass, chlorophyll content, and spatio-  
924 temporal distribution. Limnol. Ocean. **26**: 548–564. doi:10.4319/lo.1981.26.3.0548
- 925 Hollander, D. J., and J. A. McKenzie. 1991.  $\delta^{13}\text{C}$  control on carbon-isotope  
926 fractionation during aqueous photosynthesis: A paleo- $\delta^{13}\text{C}$  barometer.  
927 Geology **19**: 929–932. doi:10.1130/0091-7613(1991)019<0929:CCOCIF>2.3.CO;2
- 928 Holmes, R. M., B. J. Peterson, A. Aminot, R. K  rouel, and B. A. Hooker. 1999. A simple  
929 and precise method for measuring ammonium in marine and freshwater ecosystems.  
930 Can. J. Fish. Aquat. Sci. **56**: 1801–1808. doi:10.1139/f99-128
- 931 Horion, S., N. Bergamino, S. Stenuite, J. P. Descy, P. D. Plisnier, S. A. Loiselle, and Y.  
932 Cornet. 2010. Optimized extraction of daily bio-optical time series derived from  
933 MODIS/Aqua imagery for Lake Tanganyika, Africa. Remote Sens. Environ. **114**:  
934 781–791. doi:10.1016/j.rse.2009.11.012
- 935 Jackson, A. L., R. Inger, A. C. Parnell, and S. Bearhop. 2011. Comparing isotopic niche  
936 widths among and within communities: SIBER — Stable Isotope Bayesian Ellipses  
937 in R. J. Anim. Ecol. **80**: 595–602. doi:10.1111/j.1365-2656.2011.01806.x
- 938 Jessen, H. H., H. F. Mgana, P. Gr  nkj  r, and T. L. Lauridsen. 2019. Dietary differences



*Linking hydrodynamics to regional fish populations in Lake Tanganyika*

- 939 among commercially important fishes in Lake Tanganyika assessed using stable  
940 isotope analysis. *J. Great Lakes Res.* **45**: 1205–1214. doi:10.1016/j.jglr.2019.08.008
- 941 Junker, J., J. A. Rick, P. B. McIntyre, and others. 2020. Structural genomic variation  
942 leads to genetic differentiation in Lake Tanganyika’s sardines. *Mol. Ecol.* **29**: 3277–  
943 3298. doi:10.1111/mec.15559
- 944 De Keyzer, E. L. R., Z. De Corte, M. Van Steenberge, and others. 2019. First genomic  
945 study on Lake Tanganyika sprat *Stolothrissa tanganicae*: A lack of population  
946 structure calls for integrated management of this important fisheries target species.  
947 *BMC Evol. Biol.* **19**: 1–15. doi:10.1186/s12862-018-1325-8
- 948 Kimirei, I. A., and Y. D. Mgaya. 2007. Influence of environmental factors on seasonal  
949 changes in clupeid catches in the Kigoma area of Lake Tanganyika. *African J.*  
950 *Aquat. Sci.* **32**: 291–298. doi:10.2989/AJAS.2007.32.3.9.308
- 951 Kimirei, I. A., Y. D. Mgaya, and A. I. Chande. 2008. Changes in species composition and  
952 abundance of commercially important pelagic fish species in Kigoma area, Lake  
953 Tanganyika, Tanzania. *Aquat. Ecosyst. Heal. Manag.* **11**: 29–35.  
954 doi:10.1080/14634980701881490
- 955 Van der Knaap, M., K. I. Katonda, and G. J. De Graaf. 2014. Lake Tanganyika fisheries  
956 frame survey analysis: Assessment of the options for management of the fisheries of  
957 Lake Tanganyika. *Aquat. Ecosyst. Heal. Manag.* **17**: 4–13.  
958 doi:10.1080/14634988.2014.882733
- 959 Kurki, H., P. Mannini, I. Vuorinen, E. Aro, H. Mölsä, and O. V. Lindqvist. 1999a.

*Linking hydrodynamics to regional fish populations in Lake Tanganyika*

- 960 Macrozooplankton communities in Lake Tanganyika indicate food chain differences  
961 between the northern part and the main basins. *Hydrobiologia* **407**: 123–129.  
962 doi:10.1023/A:1003745716238
- 963 Kurki, H., I. Vuorinen, E. Bosma, and D. Bwebwa. 1999b. Spatial and temporal changes  
964 in copepod zooplankton communities of Lake Tanganyika. *Hydrobiologia* **407**: 105–  
965 114. doi:10.1023/A:1003793532168
- 966 Langlet, D., L. Y. Alleman, P.-D. Plisnier, H. Hughes, and L. André. 2007. Manganese  
967 content records seasonal upwelling in Lake Tanganyika mussels. *Biogeosciences* **4**:  
968 195–203. doi:10.5194/bg-4-195-2007
- 969 Logan, J. M., T. D. Jardine, T. J. Miller, S. E. Bunn, R. A. Cunjak, and M. E. Lutcavage.  
970 2008. Lipid corrections in carbon and nitrogen stable isotope analyses: Comparison  
971 of chemical extraction and modelling methods. *J. Anim. Ecol.* **77**: 838–846.  
972 doi:10.1111/j.1365-2656.2008.01394.x
- 973 Logan, J. M., H. Pethybridge, A. Lorrain, and others. 2020. Global patterns and  
974 inferences of tuna movements and trophodynamics from stable isotope analysis.  
975 *Deep. Res. Part II Top. Stud. Oceanogr.* **175**: 104775.  
976 doi:10.1016/j.dsr2.2020.104775
- 977 Mannini, P., K. I. Katonda, B. Kissaka, and P. Verburg. 1999. Feeding ecology of *Lates*  
978 *stappersii* in Lake Tanganyika, p. 131–139. *In* O. V. Lindqvist, H. Mölsä, K.  
979 Salonen, and J. Sarvala [eds.], *From Limnology to Fisheries: Lake Tanganyika and*  
980 *Other Large Lakes*. Springer Netherlands.

*Linking hydrodynamics to regional fish populations in Lake Tanganyika*

- 981 Mateo, M. A., O. Serrano, L. Serrano, and R. H. Michener. 2008. Effects of sample  
982 preparation on stable isotope ratios of carbon and nitrogen in marine invertebrates:  
983 Implications for food web studies using stable isotopes. *Oecologia* **157**: 105–115.  
984 doi:10.1007/s00442-008-1052-8
- 985 Matthes, H. 1967. Preliminary investigations into the biology of the Lake Tanganyika  
986 Clupeidae. *Fish. Res. Bull. Zambia* **4**: 39–45.
- 987 Matthews, B., and A. Mazumder. 2007. Distinguishing trophic variation from seasonal  
988 and size-based isotopic  $\delta^{15}\text{N}$  variation of zooplankton. *Can. J. Fish. Aquat. Sci.* **64**:  
989 74–83. doi:10.1139/F06-168
- 990 McConnaughey, T., and C. P. McRoy. 1979. Food-Web structure and the fractionation of  
991 Carbon isotopes in the bering sea. *Mar. Biol.* **53**: 257–262.  
992 doi:10.1007/BF00952434
- 993 McGlue, M. M., S. J. Ivory, J. R. Stone, and others. 2020. Solar irradiance and ENSO  
994 affect food security in Lake Tanganyika, a major African inland fishery. *Sci. Adv.* **6**:  
995 1–9. doi:10.1126/sciadv.abb2191
- 996 Mgana, H. F., A. Herzig, and Y. D. Mgaya. 2014. Diel vertical distribution and life  
997 history characteristics of *Tropodiptomus simplex* and its importance in the diet of  
998 *Stolothrissa tanganyicae*, Kigoma, Tanzania. *Aquat. Ecosyst. Heal. Manag.* **17**: 14–  
999 24. doi:10.1080/14634988.2014.877334
- 1000 Mölsä, H., J. Reynolds, E. Coenen, and O. Lindqvist. 1999. Fisheries research towards  
1001 resource management on Lake Tanganyika. *Hydrobiologia* **407**: 1–24.

*Linking hydrodynamics to regional fish populations in Lake Tanganyika*

- 1002        doi:10.1023/A:1003712708969
- 1003        Mölsä, H., J. Sarvala, S. Badende, D. Chitamwebwa, R. Kanyaru, M. Mulimbwa, and L.  
1004        Mwape. 2002. Ecosystem monitoring in the development of sustainable sheries in  
1005        Lake Tanganyika. *Aquat. Ecosyst. Heal. Manag.* **5**: 267–281.  
1006        doi:10.1080/1463498029003196
- 1007        Montgomery, W. L., and R. Galzin. 1993. Seasonality in gonads, fat deposits and  
1008        condition of tropical surgeonfishes (Teleostei: Acanthuridae). *Mar. Biol.* **115**: 529–  
1009        536. doi:10.1007/BF00349359
- 1010        Morana, C., F. Darchambeau, F. A. E. Roland, and others. 2015. Biogeochemistry of a  
1011        large and deep tropical lake (Lake Kivu, East Africa: Insights from a stable isotope  
1012        study covering an annual cycle. *Biogeosciences* **12**: 4953–4963. doi:10.5194/bg-12-  
1013        4953-2015
- 1014        Mulimbwa, N., J. A. M. Raeymaekers, and J. Sarvala. 2014a. Seasonal changes in the  
1015        pelagic catch of two clupeid zooplanktivores in relation to the abundance of copepod  
1016        zooplankton in the northern end of Lake Tanganyika. *Aquat. Ecosyst. Heal. Manag.*  
1017        **17**: 25–33. doi:10.1080/14634988.2014.883896
- 1018        Mulimbwa, N., J. Sarvala, and A. M. Joost. 2014b. Reproductive activities of two  
1019        zooplanktivorous clupeid fish in relation to the seasonal abundance of copepod prey  
1020        in the northern end of Lake Tanganyika. *Belgian J. Zool.* **144**: 77–92.  
1021        doi:10.26496/bjz.2014.68
- 1022        Mziray, P., I. A. Kimirei, P. A. Staehr, C. V. Lugomela, W. L. Perry, D. Trolle, C. M.

*Linking hydrodynamics to regional fish populations in Lake Tanganyika*

- 1023 O'Reilly, and H. F. Mgana. 2018. Seasonal patterns of thermal stratification and  
1024 primary production in the northern parts of Lake Tanganyika. *J. Great Lakes Res.*  
1025 **44**: 1209–1220. doi:10.1016/j.jglr.2018.08.015
- 1026 Naithani, J., E. Deleersnijder, and P. D. Plisnier. 2003. Analysis of wind-induced  
1027 thermocline oscillations of Lake Tanganyika. *Environ. Fluid Mech.* **3**: 23–39.  
1028 doi:10.1023/A:1021116727232
- 1029 Narita, T., N. Mulimbwa, and T. Mizuno. 1986. Vertical Distribution and Seasonal  
1030 Abundance of Zooplankters in Lake Tanganyika. *Afr. Study Monogr.* **6**: 1–16.
- 1031 O'Reilly, C. M., S. R. Alin, P.-D. Plisnier, A. S. Cohen, and B. A. McKee. 2003. Climate  
1032 change decreases aquatic ecosystem productivity of Lake Tanganyika, Africa.  
1033 *Nature* **424**: 766–768. doi:10.1038/nature01833
- 1034 O'Reilly, C. M., R. E. Hecky, A. S. Cohen, and P.-D. Plisnier. 2002. Interpreting stable  
1035 isotopes in food webs: Recognizing the role of time averaging at different trophic  
1036 levels. *Limnol. Oceanogr.* **47**: 306–309. doi:10.4319/lo.2002.47.1.0306
- 1037 Pearce, M. J. 1985. A description and stock assessment of the pelagic fishery in the  
1038 South-east arm of the Zambian waters of Lake Tanganyika. Rep. Dep. Fish. Zambia  
1039 74p.
- 1040 Pearce, M. J. 1991. A note on the importance of the prawns to the ecology of southern  
1041 Lake. *Ecol. Limnol. Study Lake Tanganyika Its Adjac. Reg. Dep. Zool. Fac. Sci.*  
1042 Kyoto Univ. Kyoto 606p.

*Linking hydrodynamics to regional fish populations in Lake Tanganyika*

- 1043 Perga, M. E., and D. Gerdeaux. 2005. “Are fish what they eat” all year round? *Oecologia*  
1044 **144**: 598–606. doi:10.1007/s00442-005-0069-5
- 1045 Plisnier, P. D., D. Chitamwebwa, L. Mwape, K. Tshibangu, V. Langenberg, and E.  
1046 Coenen. 1999. Limnological annual cycle inferred from physical-chemical  
1047 fluctuations at three stations of Lake Tanganyika. *Hydrobiologia* **407**: 45–58.  
1048 doi:10.1023/A:1003762119873
- 1049 Plisnier, P. D., H. Mgana, I. Kimirei, and others. 2009. Limnological variability and  
1050 pelagic fish abundance (*Stolothrissa tanganyicae* and *Lates stappersii*) in Lake  
1051 Tanganyika. *Hydrobiologia* **625**: 117–134. doi:10.1007/s10750-009-9701-4
- 1052 Post, D. M. 2002. Using Stable Isotopes to Estimate Trophic Position: Models, Methods,  
1053 and Assumptions. *Ecology* **83**: 703–718. doi:10.2307/3071875
- 1054 Post, D. M., C. A. Layman, D. A. Arrington, G. Takimoto, J. Quattrochi, and C. G.  
1055 Montaña. 2007. Getting to the fat of the matter: Models, methods and assumptions  
1056 for dealing with lipids in stable isotope analyses. *Oecologia* **152**: 179–189.  
1057 doi:10.1007/s00442-006-0630-x
- 1058 Rau, G. H., U. Riebesell, and D. Wolf-Gladrow. 1997. CO<sub>2</sub> (aq)-dependent photosynthetic  
1059 <sup>13</sup>C fractionation in the ocean: A model versus measurements. *Global Biogeochem.*  
1060 *Cycles* **11**: 267–278. doi:10.1029/97GB00328
- 1061 Rick, J. A., J. Junker, I. A. Kimirei, and others. 2021. The genetic population structure of  
1062 Lake Tanganyika’s Lates species flock, an endemic radiation of pelagic top  
1063 predators. bioRxiv. doi:10.1101/2021.04.23.441176

*Linking hydrodynamics to regional fish populations in Lake Tanganyika*

- 1064 Rufli, H., and D. W. Chapman. 1976. Preliminary analysis of zooplankton sampling and  
1065 estimates of fish abundance in Lake Tanganyika in October 1975. United Nations  
1066 Food Agric. Organ. Report, FI DP. URT/71/012/31 14p, FAO, Rome.
- 1067 Salonen, K., P. Högmander, V. Langenberg, H. Mölsä, J. Sarvala, A. Tarvainen, and M.  
1068 Tirola. 2012. *Limnocyclus tanganyicae* medusae (Cnidaria: Hydrozoa): A  
1069 semiautonomous microcosm in the food web of Lake Tanganyika. *Hydrobiologia*  
1070 **690**: 97–112. doi:10.1007/s10750-012-1054-8
- 1071 Sarvala, J., S. Badende, D. Chitamwebwa, and others. 2003. Size-fractionated  $\delta^{15}\text{N}$  and  
1072  $\delta^{13}\text{C}$  isotope ratios elucidate the role of the microbial food web in the pelagial of  
1073 Lake Tanganyika. *Aquat. Ecosyst. Heal. Manag.* **6**: 241–250.  
1074 doi:10.1080/14634980301493
- 1075 Sarvala, J., V. T. Langenberg, K. Salonen, and others. 2006. Fish catches from Lake  
1076 Tanganyika mainly reflect changes in fishery practices, not climate. *Verhandlungen*  
1077 *Int. Vereinigung für Theor. und Angew. Limnol.* **29**: 1182–1188.  
1078 doi:10.1080/03680770.2005.11902871
- 1079 Schnetger, B., and C. Lehnert. 2014. Determination of nitrate plus nitrite in small volume  
1080 marine water samples using vanadium(III)chloride as a reduction agent. *Mar. Chem.*  
1081 **160**: 91–98. doi:10.1016/j.marchem.2014.01.010
- 1082 Schunck, H., G. Lavik, D. K. Desai, and others. 2013. Giant Hydrogen Sulfide Plume in  
1083 the Oxygen Minimum Zone off Peru Supports Chemolithoautotrophy. *PLoS One* **8**:  
1084 e68661. doi:10.1371/journal.pone.0068661

*Linking hydrodynamics to regional fish populations in Lake Tanganyika*

- 1085 Stenuite, S., S. Pirlot, M.-A. Hardy, H. Sarmento, A.-L. Tarbe, B. Leporcq, and J.-P.  
1086 Descy. 2007. Phytoplankton production and growth rate in Lake Tanganyika:  
1087 evidence of a decline in primary productivity in recent decades. *Freshw. Biol.* **52**:  
1088 2226–2239. doi:10.1111/j.1365-2427.2007.01829.x
- 1089 Stenuite, S., A. L. Tarbe, H. Sarmento, and others. 2009. Photosynthetic picoplankton in  
1090 Lake Tanganyika: Biomass distribution patterns with depth, season and basin. *J.*  
1091 *Plankton Res.* **31**: 1531–1544. doi:10.1093/plankt/fbp090
- 1092 Tierney, J. E., M. T. Mayes, N. Meyer, C. Johnson, P. W. Swarzenski, A. S. Cohen, and  
1093 J. M. Russell. 2010. Late-twentieth-century warming in Lake Tanganyika  
1094 unprecedented since AD 500. *Nat. Geosci.* **3**: 422–425. doi:10.1038/ngeo865
- 1095 Verburg, P. 2007. The need to correct for the Suess effect in the application of  $\delta^{13}\text{C}$  in  
1096 sediment of autotrophic Lake Tanganyika, as a productivity proxy in the  
1097 Anthropocene. *J. Paleolimnol.* **37**: 591–602. doi:10.1007/s10933-006-9056-z
- 1098 Verburg, P., J. P. Antenucci, and R. E. Hecky. 2011. Differential cooling drives large-  
1099 scale convective circulation in Lake Tanganyika. *Limnol. Oceanogr.* **56**: 910–926.  
1100 doi:10.4319/lo.2011.56.3.0910
- 1101 Verburg, P., R. E. Hecky, and H. Kling. 2003. Ecological consequences of a century of  
1102 warming in Lake Tanganyika. *Science* **301**: 505–507. doi:10.1126/science.1084846
- 1103 Verburg, P., R. E. Hecky, and H. J. Kling. 2006. Climate warming decreased primary  
1104 productivity in Lake Tanganyika, inferred from accumulation of dissolved silica and  
1105 increased transparency. *Int. Vereinigung für Theor. und Angew. Limnol.*



*Linking hydrodynamics to regional fish populations in Lake Tanganyika*

- 1106        Verhandlungen **29**: 2335–2338. doi:10.1080/03680770.2006.11903112
- 1107        Wasmund, N., I. Topp, and D. Schories. 2006. Optimising the storage and extraction of  
1108        chlorophyll samples. *Oceanologia* **48**: 125–144.
- 1109        Weidel, B. C., S. R. Carpenter, J. F. Kitchell, and M. J. Van der Zanden. 2011. Rates and  
1110        components of carbon turnover in fish muscle: Insights from bioenergetics models  
1111        and a whole-lake <sup>13</sup>C addition. *Can. J. Fish. Aquat. Sci.* **68**: 387–399.  
1112        doi:10.1139/F10-158
- 1113        De Wever, A., K. Muylaert, K. Van Der Gucht, S. Pirlot, C. Cocquyt, J. Descy, and P.  
1114        Plisnier. 2005. Bacterial Community Composition in Lake Tanganyika: Vertical and  
1115        Horizontal Heterogeneity. *Appl. Environ. Microbiol.* **71**: 5029–5037.  
1116        doi:10.1128/AEM.71.9.5029–5037.2005
- 1117        De Wever, A., K. Muylaert, D. Langlet, L. Alleman, J. P. Descy, L. André, C. Cocquyt,  
1118        and W. Vyverman. 2008. Differential response of phytoplankton to additions of  
1119        nitrogen, phosphorus and iron in Lake Tanganyika. *Freshw. Biol.* **53**: 264–277.  
1120        doi:10.1111/j.1365-2427.2007.01890.x
- 1121        Winslow, L., J. Read, R. Woolway, J. Brenttrup, T. Leach, J. Zwart, S. Albers, and D.  
1122        Collinge. 2019. Package ‘rLakeAnalyzer.’ *Lake Phys. Tools*.
- 1123        Woodland, R. J., P. Magnan, H. Glémet, M. A. Rodríguez, and G. Cabana. 2012.  
1124        Variability and directionality of temporal changes in  $\delta^{13}\text{C}$  and  $\delta^{15}\text{N}$  of aquatic  
1125        invertebrate primary consumers. *Oecologia* **169**: 199–209. doi:10.1007/s00442-011-  
1126        2178-7

*Linking hydrodynamics to regional fish populations in Lake Tanganyika*

- 1127 Xia, B., Q. F. Gao, S. L. Dong, and F. Wang. 2013. Carbon stable isotope turnover and  
1128 fractionation in grass carp *Ctenopharyngodon idella* tissues. *Aquat. Biol.* **19**: 207–  
1129 216. doi:10.3354/ab00528
- 1130 Van der Zanden, M. J., G. Cabana, and J. B. Rasmussen. 1997. Comparing trophic  
1131 position of freshwater fish calculated using stable nitrogen isotope ratios ( $\delta^{15}\text{N}$ ) and  
1132 literature dietary data. *Can. J. Fish. Aquat. Sci.* **54**: 1142–1158. doi:10.1139/f97-016
- 1133

not peer-reviewed preprint
